# Supplementary material for: Chronische Entzündungserkrankungen in Deutschland
Source: Springer Nature journal article supplement (doi:10.1007/s00393-022-01306-1), 2023-01-04
Supplement: MOESM1 [file 23889240]

## Zusatzmaterial

### Chronische Entzündungserkrankungen in Deutschland

#### Eine Querschnittsanalyse über Begleiterkrankungen und Arzneimittel Einsatz

Jan Leipe, Renate Schmelz, Gabriela Riemekasten, Diamant Thaçi, Jörg Henes, Knut Schäkel, Andreas Pinter, Michael Sticherling, Joanna Wegner, Stefano Fusco, Miriam Linke, Valeria Weber, Karina C. Manz, Holger Bartz, Marit Roecken, Sandra Schmidt, Bimba F. Hoyer

Tab. S1: Definierte Therapieformen und dazugehörige Wirkstoffe

| Gruppe                                      | Klassifizierung                           | ATC Code     | Wirkstoff                                                |
|---------------------------------------------|-------------------------------------------|--------------|----------------------------------------------------------|
| Biologika/JAKI                              | Selektive Immunsuppressiva                | L04AA24      | Abatacept                                                |
|                                             |                                           | L04AA26      | Belimumab                                                |
|                                             |                                           | L04AA33      | Vedolizumab                                              |
|                                             | TNF-alpha-Inhibitor                       | L04AB01      | Etanercept                                               |
|                                             |                                           | L04AB02      | Infliximab                                               |
|                                             |                                           | L04AB04      | Adalimumab                                               |
|                                             |                                           | L04AB05      | Certolizumab pegol                                       |
|                                             |                                           | L04AB06      | Golimumab                                                |
|                                             | Interleukin-Inhibitor                     | L04AC03      | Anakinra                                                 |
|                                             |                                           | L04AC05      | Ustekinumab                                              |
|                                             |                                           | L04AC07      | Tocilizumab                                              |
|                                             |                                           | L04AC10      | Secukinumab                                              |
|                                             |                                           | L04AC12      | Brodalumab                                               |
|                                             |                                           | L04AC13      | Ixekizumab                                               |
|                                             |                                           | L04AC14      | Sarilumab                                                |
|                                             |                                           | L04AC16      | Guselkumab                                               |
|                                             |                                           | L04AC17      | Tildrakizumab                                            |
|                                             | L04AC18                                   | Risankizumab |                                                          |
|                                             | Monoklonale Antikörper                    | L01XC02      | Rituximab                                                |
| JAK-Inhibitor                               | L04AA37                                   | Baricitinib  |                                                          |
|                                             | L04AA29                                   | Tofacitinib  |                                                          |
| csDMARDs & klassische systemische Therapien | Intestinale Antiphlogistika               | A07EC01      | Sulfasalazin                                             |
|                                             |                                           | A07EC02      | Mesalazin                                                |
|                                             | Antipsoriatika zur systemischen Anwendung | D05BB02      | Acitretin                                                |
|                                             |                                           | D05BX02      | Dimethylfumarat                                          |
|                                             |                                           | D05BX51      | (Dimethylphomarat)<br>Fumarsäure-Derivate, Kombinationen |
|                                             | Immunsuppressiva                          | L04AA32      | Apremilast                                               |
|                                             |                                           | L04AA13      | Leflunomid                                               |
|                                             |                                           | L04AD01      | Cyclosporin A                                            |
| L04AX01                                     |                                           | Azathioprin  |                                                          |

| Gruppe                                 | Klassifizierung                                                     | ATC Code | Wirkstoff                 |
|----------------------------------------|---------------------------------------------------------------------|----------|---------------------------|
|                                        |                                                                     | L04AX03  | Methotrexat               |
|                                        | Antimetaboliten                                                     | L01BA01  | Methotrexat               |
|                                        | Spezifische Antirheumatika                                          | M01CX01  | Methotrexat               |
|                                        |                                                                     | M01CX02  | Sulfasalazin              |
|                                        | Malaria Mittel                                                      | P01BA02  | Hydroxychloroquin(sulfat) |
| Systemische Corticosteroide            | Systemische Corticosteroide (als Monotherapie oder als Kombination) | H02AB01  | Betamethason              |
|                                        |                                                                     | H02AB02  | Dexamethason              |
|                                        |                                                                     | H02AB03  | Fluocortolon              |
|                                        |                                                                     | H02AB04  | Methylprednisolon         |
|                                        |                                                                     | H02AB05  | Paramethason              |
|                                        |                                                                     | H02AB06  | Prednisolon               |
|                                        |                                                                     | H02AB07  | Prednison                 |
|                                        |                                                                     | H02AB08  | Triamcinolon              |
|                                        |                                                                     | H02AB09  | Hydrocortison             |
|                                        |                                                                     | H02AB10  | Cortison                  |
|                                        |                                                                     | H02AB11  | Prednylidin               |
|                                        |                                                                     | H02AB12  | Rimexolon                 |
|                                        |                                                                     | H02AB13  | Deflazacort               |
|                                        |                                                                     | H02AB14  | Cloprednol                |
|                                        |                                                                     | H02AB15  | Meprednison               |
|                                        |                                                                     | H02AB17  | Cortivazol                |
|                                        |                                                                     | H02AB51  | Betamethason-Depot        |
|                                        |                                                                     | H02AB54  | Methylprednisolon-Depot   |
|                                        |                                                                     | H02AB56  | Prednisolon-Depot         |
|                                        |                                                                     | H02AB58  | Triamcinolon-Depot        |
| H02BX01                                | Methylprednisolon, Kombinationen                                    |          |                           |
| H02BX02                                | Dexamethason, Kombinationen                                         |          |                           |
| H02BX06                                | Prednisolon, Kombinationen                                          |          |                           |
| H02BX08                                | Triamcinolon, Kombinationen                                         |          |                           |
| H02BX09                                | Betamethason, Kombinationen                                         |          |                           |
| Nicht-steroidale Antirheumatika (NSAR) | Essigsäure-Derivate und verwandte Substanzen                        | M01AB01  | Indometacin               |
|                                        |                                                                     | M01AB02  | Sulindac                  |
|                                        |                                                                     | M01AB03  | Tolmetin                  |
|                                        |                                                                     | M01AB04  | Zomepirac                 |
|                                        |                                                                     | M01AB05  | Diclofenac                |
|                                        |                                                                     | M01AB06  | Alclofenac                |
|                                        |                                                                     | M01AB07  | Bumadizon                 |
|                                        |                                                                     | M01AB08  | Etodolac                  |
|                                        |                                                                     | M01AB09  | Lonazolac                 |
|                                        |                                                                     | M01AB10  | Fentiazac                 |
|                                        |                                                                     | M01AB11  | Acemetacin                |
|                                        |                                                                     | M01AB12  | Difenpiramid              |
|                                        |                                                                     | M01AB13  | Oxametacin                |
|                                        |                                                                     | M01AB14  | Proglumetacin             |
|                                        |                                                                     | M01AB15  | Ketorolac                 |
|                                        |                                                                     | M01AB16  | Aceclofenac               |

| Gruppe                                                 | Klassifizierung                                                               | ATC Code                  | Wirkstoff                                 |
|--------------------------------------------------------|-------------------------------------------------------------------------------|---------------------------|-------------------------------------------|
|                                                        |                                                                               | M01AB17                   | Bufexamac                                 |
|                                                        |                                                                               | M01AB19                   | Carbamoylphenoxyessigsäure                |
|                                                        |                                                                               | M01AB51                   | Indometacin, Kombinationen                |
|                                                        |                                                                               | M01AB55                   | Diclofenac, Kombinationen                 |
|                                                        |                                                                               | M01AB69                   | Carbamoylphenoxyessigsäure, Kombinationen |
|                                                        | Propionsäure-Derivate                                                         | M01AE01                   | Ibuprofen                                 |
|                                                        |                                                                               | M01AE02                   | Naproxen                                  |
|                                                        |                                                                               | M01AE03                   | Ketoprofen                                |
|                                                        |                                                                               | M01AE04                   | Fenoprofen                                |
|                                                        |                                                                               | M01AE05                   | Fenbufen                                  |
|                                                        |                                                                               | M01AE06                   | Benoxaprofen                              |
|                                                        |                                                                               | M01AE07                   | Suprofen                                  |
|                                                        |                                                                               | M01AE08                   | Pirprofen                                 |
|                                                        |                                                                               | M01AE09                   | Flurbiprofen                              |
|                                                        |                                                                               | M01AE10                   | Indoprofen                                |
|                                                        |                                                                               | M01AE11                   | Tiaprofensäure                            |
|                                                        |                                                                               | M01AE12                   | Oxaprozin                                 |
|                                                        |                                                                               | M01AE13                   | Ibuproxam                                 |
|                                                        |                                                                               | M01AE14                   | Dexibuprofen                              |
|                                                        |                                                                               | M01AE15                   | Flunoxaprofen                             |
|                                                        |                                                                               | M01AE16                   | Alminoprofen                              |
|                                                        |                                                                               | M01AE17                   | Dexketoprofen                             |
|                                                        |                                                                               | M01AE18                   | Naproxinod                                |
|                                                        |                                                                               | M01AE20                   | Carprofen                                 |
|                                                        |                                                                               | M01AE51                   | Ibuprofen, Kombinationen                  |
|                                                        | M01AE52                                                                       | Naproxen und Esomeprazol  |                                           |
|                                                        | M01AE53                                                                       | Ketoprofen, Kombinationen |                                           |
| M01AE56                                                | Naproxen und Misoprostol                                                      |                           |                                           |
| Coxibe                                                 | Coxibe                                                                        | M01AH01                   | Celecoxib                                 |
|                                                        |                                                                               | M01AH02                   | Rofecoxib                                 |
|                                                        |                                                                               | M01AH03                   | Valdecoxib                                |
|                                                        |                                                                               | M01AH04                   | Parecoxib                                 |
|                                                        |                                                                               | M01AH05                   | Etoricoxib                                |
|                                                        |                                                                               | M01AH06                   | Lumiracoxib                               |
| Nicht-steroidale Antipsoriatika zur dermalen Anwendung | Antipsoriatika zur dermalen Anwendung (als Monotherapie oder als Kombination) | D05AC01                   | Dithranol                                 |
|                                                        |                                                                               | D05AC51                   | Dithranol, Kombinationen                  |
|                                                        |                                                                               | D05AX02                   | Calcipotriol                              |
|                                                        |                                                                               | D05AX03                   | Calcitriol                                |
|                                                        |                                                                               | D05AX04                   | Tacalcitol                                |
|                                                        |                                                                               | D05AX05                   | Tazaroten                                 |
|                                                        |                                                                               | D05AX22                   | Calcipotriol und Betamethason             |
|                                                        |                                                                               | D05AX52                   | Calcipotriol, Kombinationen               |
| D05AX56                                                | Salicylsäure, Kombinationen                                                   |                           |                                           |

Tab. S2: Top 10-Ranking der dokumentierten Diagnosen/Maßnahmen pro Indikation und der korrespondierenden Referenzpopulation

| Indikation           | Kohorte  |                                                                                                |       |      | Referenzpopulation |                                                                                                          |       |       |
|----------------------|----------|------------------------------------------------------------------------------------------------|-------|------|--------------------|----------------------------------------------------------------------------------------------------------|-------|-------|
|                      | ICD-Code | Diagnose/Maßnahme                                                                              | n     | %    | ICD-Code           | Diagnose/Maßnahme                                                                                        | n     | %     |
| <b>MC (n=14.455)</b> | M54      | Rückenschmerzen                                                                                | 5.345 | 37,0 | I10                | Essentielle (primäre) Hypertonie                                                                         | 4.692 | 32,46 |
|                      | I10      | Essentielle (primäre) Hypertonie                                                               | 5.293 | 36,6 | Z12                | Spezielle Verfahren zur Untersuchung auf Neubildungen                                                    | 4.414 | 30,54 |
|                      | Z12      | Spezielle Verfahren zur Untersuchung auf Neubildungen                                          | 4.924 | 34,1 | M54                | Rückenschmerzen                                                                                          | 4.377 | 30,28 |
|                      | H52      | Akkommodationsstörungen und Refraktionsfehler                                                  | 3.763 | 26,0 | E78                | Störungen des Lipoproteinstoffwechsels und sonstige Lipidämien                                           | 3.467 | 23,98 |
|                      | J06      | Akute Infektionen an mehreren oder nicht näher bezeichneten Lokalisationen der oberen Atemwege | 3.585 | 24,8 | J06                | Akute Infektionen an mehreren oder nicht näher bezeichneten Lokalisationen der oberen Atemwege           | 3.034 | 20,99 |
|                      | R10      | Bauch- und Beckenschmerzen                                                                     | 3.394 | 23,5 | H52                | Akkommodationsstörungen und Refraktionsfehler                                                            | 2.849 | 19,71 |
|                      | E78      | Störungen des Lipoproteinstoffwechsels und sonstige Lipidämien                                 | 3.296 | 22,8 | Z30                | Kontrazeptive Maßnahmen                                                                                  | 2.676 | 18,51 |
|                      | F32      | Depressive Episode                                                                             | 3.091 | 21,4 | N89                | Sonstige nichtentzündliche Krankheiten der Vagina                                                        | 2.546 | 17,61 |
|                      | Z25      | Notwendigkeit der Impfung [Immunsierung] gegen andere einzelne Viruskrankheiten                | 2.855 | 19,8 | Z00                | Allgemeinuntersuchung und Abklärung bei Personen ohne Beschwerden oder angegebene Diagnose               | 2.313 | 16,00 |
|                      | Z30      | Kontrazeptive Maßnahmen                                                                        | 2.848 | 19,7 | Z01                | Sonstige spezielle Untersuchungen und Abklärungen bei Personen ohne Beschwerden oder angegebene Diagnose | 2.076 | 14,36 |
| <b>CU (n=16.790)</b> | I10      | Essentielle (primäre) Hypertonie                                                               | 7.213 | 43,0 | I10                | Essentielle (primäre) Hypertonie                                                                         | 6.817 | 40,60 |
|                      | M54      | Rückenschmerzen                                                                                | 6.331 | 37,7 | M54                | Rückenschmerzen                                                                                          | 5.198 | 30,96 |
|                      | Z12      | Spezielle Verfahren zur Untersuchung auf Neubildungen                                          | 5.646 | 33,6 | E78                | Störungen des Lipoproteinstoffwechsels und sonstige Lipidämien                                           | 4.882 | 29,08 |
|                      | E78      | Störungen des Lipoproteinstoffwechsels und sonstige Lipidämien                                 | 5.243 | 31,2 | Z12                | Spezielle Verfahren zur Untersuchung auf Neubildungen                                                    | 4.720 | 28,11 |
|                      | H52      | Akkommodationsstörungen und Refraktionsfehler                                                  | 4.881 | 29,1 | H52                | Akkommodationsstörungen und Refraktionsfehler                                                            | 3.844 | 22,89 |
|                      | Z25      | Notwendigkeit der Impfung [Immunsierung] gegen andere einzelne Viruskrankheiten                | 3.731 | 22,2 | J06                | Akute Infektionen an mehreren oder nicht näher bezeichneten Lokalisationen der oberen Atemwege           | 3.145 | 18,73 |

| Indikation            | Kohorte  |                                                                                                |        |       | Referenzpopulation |                                                                                                |        |       |
|-----------------------|----------|------------------------------------------------------------------------------------------------|--------|-------|--------------------|------------------------------------------------------------------------------------------------|--------|-------|
|                       | ICD-Code | Diagnose/Maßnahme                                                                              | n      | %     | ICD-Code           | Diagnose/Maßnahme                                                                              | n      | %     |
|                       | J06      | Akute Infektionen an mehreren oder nicht näher bezeichneten Lokalisationen der oberen Atemwege | 3.723  | 22,2  | Z00                | Allgemeinuntersuchung und Abklärung bei Personen ohne Beschwerden oder angegebene Diagnose     | 2.852  | 16,99 |
|                       | F32      | Depressive Episode                                                                             | 3.416  | 20,3  | Z25                | Notwendigkeit der Impfung [Immunsierung] gegen andere einzelne Viruskrankheiten                | 2.540  | 15,13 |
|                       | Z00      | Allgemeinuntersuchung und Abklärung bei Personen ohne Beschwerden oder angegebene Diagnose     | 3300   | 19,65 | Z30                | Kontrazeptive Maßnahmen                                                                        | 2.296  | 13,67 |
|                       | F45      | Somatoforme Störungen                                                                          | 3.231  | 19,2  | N89                | Sonstige nichtentzündliche Krankheiten der Vagina                                              | 2.295  | 13,67 |
| <b>Pso (n=73.726)</b> | I10      | Essentielle (primäre) Hypertonie                                                               | 41.871 | 56,8  | I10                | Essentielle (primäre) Hypertonie                                                               | 34.864 | 47,29 |
|                       | M54      | Rückenschmerzen                                                                                | 30.792 | 41,8  | E78                | Störungen des Lipoproteinstoffwechsels und sonstige Lipidämien                                 | 25.275 | 34,28 |
|                       | E78      | Störungen des Lipoproteinstoffwechsels und sonstige Lipidämien                                 | 30.724 | 41,7  | M54                | Rückenschmerzen                                                                                | 24.017 | 32,58 |
|                       | Z12      | Spezielle Verfahren zur Untersuchung auf Neubildungen                                          | 25.495 | 34,6  | Z12                | Spezielle Verfahren zur Untersuchung auf Neubildungen                                          | 21.535 | 29,21 |
|                       | H52      | Akkommodationsstörungen und Refraktionsfehler                                                  | 23.411 | 31,8  | H52                | Akkommodationsstörungen und Refraktionsfehler                                                  | 18.595 | 25,22 |
|                       | Z25      | Notwendigkeit der Impfung [Immunsierung] gegen andere einzelne Viruskrankheiten                | 17.697 | 24    | Z00                | Allgemeinuntersuchung und Abklärung bei Personen ohne Beschwerden oder angegebene Diagnose     | 14.105 | 19,13 |
|                       | E66      | Adipositas                                                                                     | 16.878 | 22,9  | Z25                | Notwendigkeit der Impfung [Immunsierung] gegen andere einzelne Viruskrankheiten                | 13.689 | 18,57 |
|                       | Z00      | Allgemeinuntersuchung und Abklärung bei Personen ohne Beschwerden oder angegebene Diagnose     | 16.232 | 22,0  | J06                | Akute Infektionen an mehreren oder nicht näher bezeichneten Lokalisationen der oberen Atemwege | 12.365 | 16,77 |
|                       | E11      | Diabetes mellitus, Typ 2                                                                       | 15.508 | 21,0  | E11                | Diabetes mellitus, Typ 2                                                                       | 11.514 | 15,62 |
|                       | M47      | Spondylose                                                                                     | 14.982 | 20,3  | E66                | Adipositas                                                                                     | 10.917 | 14,81 |
| <b>PsA (n=11.493)</b> | L40      | Psoriasis                                                                                      | 8.447  | 73,50 | I10                | Essentielle (primäre) Hypertonie                                                               | 5.106  | 44,43 |
|                       | I10      | Essentielle (primäre) Hypertonie                                                               | 6.445  | 56,08 | E78                | Störungen des Lipoproteinstoffwechsels und sonstige Lipidämien                                 | 3.792  | 32,99 |
|                       | M54      | Rückenschmerzen                                                                                | 5.643  | 49,10 | M54                | Rückenschmerzen                                                                                | 3.776  | 32,85 |
|                       | E78      | Störungen des Lipoproteinstoffwechsels und sonstige Lipidämien                                 | 4.545  | 39,55 | Z12                | Spezielle Verfahren zur Untersuchung auf Neubildungen                                          | 3.687  | 32,08 |

| Indikation     | Kohorte  |                                                                                 |        |       | Referenzpopulation |                                                                                                |        |       |
|----------------|----------|---------------------------------------------------------------------------------|--------|-------|--------------------|------------------------------------------------------------------------------------------------|--------|-------|
|                | ICD-Code | Diagnose/Maßnahme                                                               | n      | %     | ICD-Code           | Diagnose/Maßnahme                                                                              | n      | %     |
|                | Z12      | Spezielle Verfahren zur Untersuchung auf Neubildungen                           | 4.291  | 37,34 | H52                | Akkommodationsstörungen und Refraktionsfehler                                                  | 2.751  | 23,94 |
|                | M79      | Sonstige Krankheiten des Weichteilgewebes, anderenorts nicht klassifiziert      | 4.061  | 35,33 | Z00                | Allgemeinuntersuchung und Abklärung bei Personen ohne Beschwerden oder angegebene Diagnose     | 2.129  | 18,52 |
|                | M06      | Sonstige chronische Polyarthritis                                               | 3.855  | 33,54 | J06                | Akute Infektionen an mehreren oder nicht näher bezeichneten Lokalisationen der oberen Atemwege | 1.993  | 17,34 |
|                | H52      | Akkommodationsstörungen und Refraktionsfehler                                   | 3.854  | 33,53 | Z25                | Notwendigkeit der Impfung [Immunsierung] gegen andere einzelne Viruskrankheiten                | 1.986  | 17,28 |
|                | M47      | Spondylose                                                                      | 3.103  | 27,00 | F32                | Depressive Episode                                                                             | 1.703  | 14,82 |
|                | Z25      | Notwendigkeit der Impfung [Immunsierung] gegen andere einzelne Viruskrankheiten | 3.004  | 26,14 | E66                | Adipositas                                                                                     | 1.695  | 14,75 |
| SpA (n=11.818) | I10      | Essentielle (primäre) Hypertonie                                                | 6.227  | 52,7  | I10                | Essentielle (primäre) Hypertonie                                                               | 5.259  | 44,50 |
|                | M54      | Rückenschmerzen                                                                 | 5.983  | 50,6  | E78                | Störungen des Lipoproteinstoffwechsels und sonstige Lipidämien                                 | 3.857  | 32,64 |
|                | E78      | Störungen des Lipoproteinstoffwechsels und sonstige Lipidämien                  | 4.408  | 37,3  | M54                | Rückenschmerzen                                                                                | 3.801  | 32,16 |
|                | Z12      | Spezielle Verfahren zur Untersuchung auf Neubildungen                           | 3.954  | 33,5  | Z12                | Spezielle Verfahren zur Untersuchung auf Neubildungen                                          | 3.346  | 28,31 |
|                | H52      | Akkommodationsstörungen und Refraktionsfehler                                   | 3.938  | 33,3  | H52                | Akkommodationsstörungen und Refraktionsfehler                                                  | 2.866  | 24,25 |
|                | M47      | Spondylose                                                                      | 3.370  | 28,5  | Z00                | Allgemeinuntersuchung und Abklärung bei Personen ohne Beschwerden oder angegebene Diagnose     | 2.160  | 18,28 |
|                | M79      | Sonstige Krankheiten des Weichteilgewebes, anderenorts nicht klassifiziert      | 3.253  | 27,5  | J06                | Akute Infektionen an mehreren oder nicht näher bezeichneten Lokalisationen der oberen Atemwege | 2.017  | 17,07 |
|                | R52      | Schmerz, anderenorts nicht klassifiziert                                        | 3.016  | 25,5  | Z25                | Notwendigkeit der Impfung [Immunsierung] gegen andere einzelne Viruskrankheiten                | 2.005  | 16,97 |
|                | Z25      | Notwendigkeit der Impfung [Immunsierung] gegen andere einzelne Viruskrankheiten | 2.859  | 24,2  | E11                | Diabetes mellitus, Typ 2                                                                       | 1.731  | 14,65 |
|                | F32      | Depressive Episode                                                              | 2.781  | 23,5  | E66                | Adipositas                                                                                     | 1.656  | 14,01 |
| RA (n=54.880)  | I10      | Essentielle (primäre) Hypertonie                                                | 35.669 | 65,0  | I10                | Essentielle (primäre) Hypertonie                                                               | 31.070 | 56,61 |
|                | M54      | Rückenschmerzen                                                                 | 27.915 | 50,9  | E78                | Störungen des Lipoproteinstoffwechsels und sonstige Lipidämien                                 | 22.167 | 40,39 |

| Indikation | Kohorte  |                                                                                 |        |      | Referenzpopulation |                                                                                            |        |       |
|------------|----------|---------------------------------------------------------------------------------|--------|------|--------------------|--------------------------------------------------------------------------------------------|--------|-------|
|            | ICD-Code | Diagnose/Maßnahme                                                               | n      | %    | ICD-Code           | Diagnose/Maßnahme                                                                          | n      | %     |
|            | E78      | Störungen des Lipoproteinstoffwechsels und sonstige Lipidämien                  | 25.466 | 46,4 | M54                | Rückenschmerzen                                                                            | 19.338 | 35,24 |
|            | M79      | Sonstige Krankheiten des Weichteilgewebes, anderenorts nicht klassifiziert      | 22.321 | 40,7 | Z12                | Spezielle Verfahren zur Untersuchung auf Neubildungen                                      | 17.366 | 31,64 |
|            | H52      | Akkommodationsstörungen und Refraktionsfehler                                   | 22.143 | 40,3 | H52                | Akkommodationsstörungen und Refraktionsfehler                                              | 16.561 | 30,18 |
|            | Z12      | Spezielle Verfahren zur Untersuchung auf Neubildungen                           | 19.531 | 35,6 | Z25                | Notwendigkeit der Impfung [Immunsierung] gegen andere einzelne Viruskrankheiten            | 13.218 | 24,09 |
|            | Z25      | Notwendigkeit der Impfung [Immunsierung] gegen andere einzelne Viruskrankheiten | 16.985 | 31,0 | Z00                | Allgemeinuntersuchung und Abklärung bei Personen ohne Beschwerden oder angegebene Diagnose | 11.223 | 20,45 |
|            | M47      | Spondylose                                                                      | 16.481 | 30,0 | E11                | Diabetes mellitus, Typ 2                                                                   | 10.397 | 18,94 |
|            | M17      | Gonarthrose [Arthrose des Kniegelenkes]                                         | 16.078 | 29,3 | N95                | Klimakterische Störungen                                                                   | 9.595  | 17,48 |
|            | R52      | Schmerz, anderenorts nicht klassifiziert                                        | 16.022 | 29,2 | E04                | Sonstige nichttoxische Struma                                                              | 9.476  | 17,27 |

Tab. S3: Demografie der Therapieformen – Total

| Therapiegruppe                                       | Altersgruppen | Weiblich |              | Männlich |              | Gesamt |              |
|------------------------------------------------------|---------------|----------|--------------|----------|--------------|--------|--------------|
|                                                      |               | n        | %            | n        | %            | n      | %            |
| Biologika/JAKi                                       | 1-10          | 16       | 0,2%         | 8        | 0,1%         | 24     | 0,2%         |
|                                                      | 11-20         | 203      | 3,0%         | 177      | 3,1%         | 380    | 3,0%         |
|                                                      | 21-30         | 613      | 9,1%         | 590      | 10,2%        | 1.203  | 9,6%         |
|                                                      | 31-40         | 853      | 12,7%        | 944      | 16,3%        | 1.797  | 14,4%        |
|                                                      | 41-50         | 1.011    | 15,0%        | 1.165    | 20,2%        | 2.176  | 17,4%        |
|                                                      | 51-60         | 1.660    | <b>24,7%</b> | 1.547    | <b>26,8%</b> | 3.207  | <b>25,6%</b> |
|                                                      | 61-70         | 1.416    | 21,0%        | 883      | 15,3%        | 2.299  | 18,4%        |
|                                                      | 71-80         | 788      | 11,7%        | 380      | 6,6%         | 1.168  | 9,3%         |
|                                                      | 81-90         | 165      | 2,5%         | 83       | 1,4%         | 248    | 2,0%         |
|                                                      | ≥ 91          | <5       | *            | <5       | *            | <5     | *            |
|                                                      | Gesamt        | 6.727    | 100,0%       | 5.778    | 100,0%       | 12.505 | 100,0%       |
| csDMARDs & klassische systemische Therapien          | 1-10          | 39       | 0,2%         | 30       | 0,2%         | 69     | 0,2%         |
|                                                      | 11-20         | 272      | 1,3%         | 245      | 1,7%         | 517    | 1,4%         |
|                                                      | 21-30         | 977      | 4,5%         | 792      | 5,5%         | 1.769  | 4,9%         |
|                                                      | 31-40         | 1.741    | 8,1%         | 1.353    | 9,4%         | 3.094  | 8,6%         |
|                                                      | 41-50         | 2.632    | 12,2%        | 1.988    | 13,8%        | 4.620  | 12,8%        |
|                                                      | 51-60         | 4.873    | 22,6%        | 3.537    | <b>24,5%</b> | 8.410  | <b>23,3%</b> |
|                                                      | 61-70         | 5.206    | <b>24,1%</b> | 3.190    | 22,1%        | 8.396  | 23,3%        |
|                                                      | 71-80         | 4.020    | 18,6%        | 2.435    | 16,8%        | 6.455  | 17,9%        |
|                                                      | 81-90         | 1.691    | 7,8%         | 852      | 5,9%         | 2.543  | 7,1%         |
|                                                      | ≥ 91          | 112      | 0,5%         | 35       | 0,2%         | 147    | 0,4%         |
|                                                      | Gesamt        | 21.563   | 100,0%       | 14.457   | 100,0%       | 36.020 | 100,0%       |
| Systemische Corticosteroide als Monotherapie         | 1-10          | 20       | 0,1%         | 25       | 0,3%         | 45     | 0,2%         |
|                                                      | 11-20         | 65       | 0,5%         | 31       | 0,4%         | 96     | 0,4%         |
|                                                      | 21-30         | 272      | 2,0%         | 184      | 2,1%         | 456    | 2,0%         |
|                                                      | 31-40         | 613      | 4,4%         | 335      | 3,8%         | 948    | 4,2%         |
|                                                      | 41-50         | 1.067    | 7,7%         | 739      | 8,5%         | 1.806  | 8,0%         |
|                                                      | 51-60         | 2.494    | 17,9%        | 1.704    | 19,6%        | 4.198  | 18,6%        |
|                                                      | 61-70         | 3.241    | 23,3%        | 1.997    | 22,9%        | 5.238  | 23,2%        |
|                                                      | 71-80         | 3.528    | <b>25,4%</b> | 2.294    | <b>26,4%</b> | 5.822  | <b>25,7%</b> |
|                                                      | 81-90         | 2.356    | 16,9%        | 1.290    | 14,8%        | 3.646  | 16,1%        |
|                                                      | ≥ 91          | 260      | 1,9%         | 105      | 1,2%         | 365    | 1,6%         |
|                                                      | Gesamt        | 13.916   | 100,0%       | 8.704    | 100,0%       | 22.620 | 100,0%       |
| Systemische Corticosteroide als Kombinationstherapie | 1-10          | 16       | 0,1%         | 15       | 0,2%         | 31     | 0,2%         |
|                                                      | 11-20         | 157      | 1,3%         | 123      | 1,7%         | 280    | 1,4%         |
|                                                      | 21-30         | 554      | 4,4%         | 378      | 5,3%         | 932    | 4,7%         |
|                                                      | 31-40         | 829      | 6,6%         | 518      | 7,3%         | 1.347  | 6,9%         |
|                                                      | 41-50         | 1.361    | 10,9%        | 853      | 12,0%        | 2.214  | 11,3%        |
|                                                      | 51-60         | 2.786    | 22,2%        | 1.803    | <b>25,4%</b> | 4.589  | 23,4%        |
|                                                      | 61-70         | 3.117    | <b>24,9%</b> | 1.600    | 22,5%        | 4.717  | <b>24,0%</b> |
|                                                      | 71-80         | 2.618    | 20,9%        | 1.344    | 18,9%        | 3.962  | 20,2%        |
|                                                      | 81-90         | 1.042    | 8,3%         | 464      | 6,5%         | 1.506  | 7,7%         |

| Therapiegruppe                                                                  | Altersgruppen | Weiblich |        | Männlich |        | Gesamt |        |
|---------------------------------------------------------------------------------|---------------|----------|--------|----------|--------|--------|--------|
|                                                                                 |               | n        | %      | n        | %      | n      | %      |
|                                                                                 | ≥ 91          | 42       | 0,3%   | 13       | 0,2%   | 55     | 0,3%   |
|                                                                                 | Gesamt        | 12.522   | 100,0% | 7.111    | 100,0% | 19.633 | 100,0% |
| NSAR – nichtsteroidales Antirheumatikum                                         | 1-10          | 115      | 0,6%   | 99       | 0,7%   | 214    | 0,6%   |
|                                                                                 | 11-20         | 235      | 1,2%   | 156      | 1,0%   | 391    | 1,1%   |
|                                                                                 | 21-30         | 619      | 3,1%   | 435      | 2,9%   | 1.054  | 3,0%   |
|                                                                                 | 31-40         | 1.219    | 6,2%   | 1.084    | 7,2%   | 2.303  | 6,6%   |
|                                                                                 | 41-50         | 2.136    | 10,8%  | 1.891    | 12,6%  | 4.027  | 11,6%  |
|                                                                                 | 51-60         | 4.181    | 21,1%  | 3.699    | 24,7%  | 7.880  | 22,7%  |
|                                                                                 | 61-70         | 4.915    | 24,8%  | 3.537    | 23,6%  | 8.452  | 24,3%  |
|                                                                                 | 71-80         | 4.150    | 20,9%  | 2.771    | 18,5%  | 6.921  | 19,9%  |
|                                                                                 | 81-90         | 2.017    | 10,2%  | 1.210    | 8,1%   | 3.227  | 9,3%   |
|                                                                                 | ≥ 91          | 227      | 1,1%   | 85       | 0,6%   | 312    | 0,9%   |
|                                                                                 | Gesamt        | 19.814   | 100,0% | 14.967   | 100,0% | 34.781 | 100,0% |
| Coxibe (COX-2-Hemmer)                                                           | 1-10          | 0        | 0,0%   | 0        | 0,0%   | 0      | 0,0%   |
|                                                                                 | 11-20         | 9        | 0,5%   | <5       | *      | 11     | 0,4%   |
|                                                                                 | 21-30         | 44       | 2,3%   | 35       | 3,0%   | 79     | 2,6%   |
|                                                                                 | 31-40         | 97       | 5,2%   | 101      | 8,8%   | 198    | 6,5%   |
|                                                                                 | 41-50         | 190      | 10,1%  | 138      | 12,0%  | 328    | 10,8%  |
|                                                                                 | 51-60         | 415      | 22,0%  | 302      | 26,2%  | 717    | 23,6%  |
|                                                                                 | 61-70         | 447      | 23,7%  | 268      | 23,3%  | 715    | 23,6%  |
|                                                                                 | 71-80         | 428      | 22,7%  | 197      | 17,1%  | 625    | 20,6%  |
|                                                                                 | 81-90         | 216      | 11,5%  | 103      | 8,9%   | 319    | 10,5%  |
|                                                                                 | ≥ 91          | 37       | 2,0%   | 5        | 0,4%   | 42     | 1,4%   |
|                                                                                 | Gesamt        | 1.883    | 100,0% | 1.151    | 100,0% | 3.034  | 100,0% |
| Nicht-steroidale Antipsoriatika zur dermalen Anwendung als Monotherapie         | 1-10          | 16       | 0,3%   | 11       | 0,2%   | 27     | 0,2%   |
|                                                                                 | 11-20         | 109      | 2,3%   | 108      | 1,7%   | 217    | 1,9%   |
|                                                                                 | 21-30         | 341      | 7,1%   | 377      | 6,0%   | 718    | 6,5%   |
|                                                                                 | 31-40         | 518      | 10,8%  | 744      | 11,8%  | 1.262  | 11,3%  |
|                                                                                 | 41-50         | 634      | 13,2%  | 1.022    | 16,2%  | 1.656  | 14,9%  |
|                                                                                 | 51-60         | 1.121    | 23,3%  | 1.570    | 24,8%  | 2.691  | 24,2%  |
|                                                                                 | 61-70         | 1.095    | 22,8%  | 1.410    | 22,3%  | 2.505  | 22,5%  |
|                                                                                 | 71-80         | 691      | 14,4%  | 825      | 13,0%  | 1.516  | 13,6%  |
|                                                                                 | 81-90         | 253      | 5,3%   | 246      | 3,9%   | 499    | 4,5%   |
|                                                                                 | ≥ 91          | 28       | 0,6%   | 12       | 0,2%   | 40     | 0,4%   |
|                                                                                 | Gesamt        | 4.806    | 100,0% | 6.325    | 100,0% | 11.131 | 100,0% |
| Nicht-steroidale Antipsoriatika zur dermalen Anwendung als Kombinationstherapie | 1-10          | <5       | *      | 0        | 0,0%   | <5     | *      |
|                                                                                 | 11-20         | 19       | 2,0%   | 14       | 1,0%   | 33     | 1,4%   |
|                                                                                 | 21-30         | 55       | 5,9%   | 93       | 6,9%   | 148    | 6,5%   |
|                                                                                 | 31-40         | 100      | 10,8%  | 187      | 13,8%  | 287    | 12,6%  |
|                                                                                 | 41-50         | 144      | 15,5%  | 311      | 23,0%  | 455    | 19,9%  |
|                                                                                 | 51-60         | 273      | 29,4%  | 373      | 27,6%  | 646    | 28,3%  |
|                                                                                 | 61-70         | 227      | 24,4%  | 234      | 17,3%  | 461    | 20,2%  |
|                                                                                 | 71-80         | 92       | 9,9%   | 116      | 8,6%   | 208    | 9,1%   |
|                                                                                 | 81-90         | 15       | 1,6%   | 23       | 1,7%   | 38     | 1,7%   |

| Therapiegruppe | Altersgruppen | Weiblich |        | Männlich |        | Gesamt |        |
|----------------|---------------|----------|--------|----------|--------|--------|--------|
|                |               | n        | %      | n        | %      | n      | %      |
|                | ≥ 91          | <5       | *      | <5       | *      | <5     | *      |
|                | Gesamt        | 930      | 100,0% | 1.352    | 100,0% | 2.282  | 100,0% |

\* Werte können aus Datenschutzgründen nicht ausgewiesen werden

Tab. S4: Demografie der Therapieformen – Morbus Crohn

| Therapiegruppe                                       | Altersgruppen | Weiblich |              | Männlich |              | Gesamt |              |
|------------------------------------------------------|---------------|----------|--------------|----------|--------------|--------|--------------|
|                                                      |               | n        | %            | n        | %            | n      | %            |
| Biologika/JAKi                                       | 1-10          | <5       | *            | 5        | 0,4%         | 8      | 0,3%         |
|                                                      | 11-20         | 90       | 7,2%         | 109      | 8,9%         | 199    | 8,0%         |
|                                                      | 21-30         | 271      | <b>21,6%</b> | 267      | 21,7%        | 538    | 21,6%        |
|                                                      | 31-40         | 267      | 21,3%        | 286      | <b>23,3%</b> | 553    | <b>22,3%</b> |
|                                                      | 41-50         | 208      | 16,6%        | 214      | 17,4%        | 422    | 17,0%        |
|                                                      | 51-60         | 261      | 20,8%        | 215      | 17,5%        | 476    | 19,2%        |
|                                                      | 61-70         | 121      | 9,6%         | 95       | 7,7%         | 216    | 8,7%         |
|                                                      | 71-80         | 32       | 2,5%         | 36       | 2,9%         | 68     | 2,7%         |
|                                                      | 81-90         | <5       | *            | <5       | *            | 5      | 0,2%         |
|                                                      | ≥ 91          | 0        | 0,0%         | 0        | 0,0%         | 0      | 0,0%         |
|                                                      | Gesamt        | 1.256    | 100,0%       | 1.229    | 100,0%       | 2.485  | 100,0%       |
| csDMARDs & klassische systemische Therapien          | 1-10          | 11       | 0,4%         | 10       | 0,5%         | 21     | 0,5%         |
|                                                      | 11-20         | 95       | 3,8%         | 112      | 5,2%         | 207    | 4,4%         |
|                                                      | 21-30         | 264      | 10,5%        | 244      | 11,4%        | 508    | 10,9%        |
|                                                      | 31-40         | 338      | 13,4%        | 322      | 15,1%        | 660    | 14,2%        |
|                                                      | 41-50         | 400      | 15,9%        | 359      | 16,8%        | 759    | 16,3%        |
|                                                      | 51-60         | 618      | <b>24,5%</b> | 473      | <b>22,2%</b> | 1.091  | <b>23,4%</b> |
|                                                      | 61-70         | 445      | 17,7%        | 343      | 16,1%        | 788    | 16,9%        |
|                                                      | 71-80         | 240      | 9,5%         | 202      | 9,5%         | 442    | 9,5%         |
|                                                      | 81-90         | 95       | 3,8%         | 70       | 3,3%         | 165    | 3,5%         |
|                                                      | ≥ 91          | 14       | 0,6%         | 0        | 0,0%         | 14     | 0,3%         |
|                                                      | Gesamt        | 2.520    | 100,0%       | 2.135    | 100,0%       | 4.655  | 100,0%       |
| Systemische Corticosteroide als Monotherapie         | 1-10          | <5       | *            | <5       | *            | <5     | *            |
|                                                      | 11-20         | 6        | 0,8%         | 6        | 1,4%         | 12     | 1,1%         |
|                                                      | 21-30         | 51       | 7,2%         | 40       | 9,2%         | 91     | 8,0%         |
|                                                      | 31-40         | 93       | 13,2%        | 52       | 11,9%        | 145    | 12,7%        |
|                                                      | 41-50         | 98       | 13,9%        | 75       | 17,2%        | 173    | 15,1%        |
|                                                      | 51-60         | 188      | <b>26,6%</b> | 110      | <b>25,2%</b> | 298    | <b>26,1%</b> |
|                                                      | 61-70         | 139      | 19,7%        | 68       | 15,6%        | 207    | 18,1%        |
|                                                      | 71-80         | 88       | 12,5%        | 56       | 12,8%        | 144    | 12,6%        |
|                                                      | 81-90         | 38       | 5,4%         | 26       | 6,0%         | 64     | 5,6%         |
|                                                      | ≥ 91          | <5       | *            | <5       | *            | 6      | 0,5%         |
|                                                      | Gesamt        | 706      | 100,0%       | 436      | 100,0%       | 1.142  | 100,0%       |
| Systemische Corticosteroide als Kombinationstherapie | 1-10          | 7        | 0,6%         | 7        | 0,8%         | 14     | 0,7%         |
|                                                      | 11-20         | 71       | 6,2%         | 65       | 7,0%         | 136    | 6,5%         |
|                                                      | 21-30         | 173      | 15,1%        | 152      | 16,3%        | 325    | 15,6%        |
|                                                      | 31-40         | 166      | 14,5%        | 147      | 15,8%        | 313    | 15,1%        |
|                                                      | 41-50         | 167      | 14,6%        | 139      | 14,9%        | 306    | 14,7%        |
|                                                      | 51-60         | 263      | <b>22,9%</b> | 224      | <b>24,0%</b> | 487    | <b>23,4%</b> |
|                                                      | 61-70         | 184      | 16,0%        | 101      | 10,8%        | 285    | 13,7%        |
|                                                      | 71-80         | 79       | 6,9%         | 71       | 7,6%         | 150    | 7,2%         |
|                                                      | 81-90         | 34       | 3,0%         | 26       | 2,8%         | 60     | 2,9%         |

| Therapiegruppe                                                                  | Altersgruppen | Weiblich |              | Männlich |              | Gesamt |              |
|---------------------------------------------------------------------------------|---------------|----------|--------------|----------|--------------|--------|--------------|
|                                                                                 |               | n        | %            | n        | %            | n      | %            |
|                                                                                 | ≥ 91          | <5       | *            | 0        | 0,0%         | <5     | *            |
|                                                                                 | Gesamt        | 1.147    | 100,0%       | 932      | 100,0%       | 2.079  | 100,0%       |
| NSAR – nichtsteroidales Antirheumatikum                                         | 1-10          | 8        | 1,0%         | 11       | 1,8%         | 19     | 1,3%         |
|                                                                                 | 11-20         | 13       | 1,6%         | 6        | 1,0%         | 19     | 1,3%         |
|                                                                                 | 21-30         | 57       | 7,0%         | 37       | 6,2%         | 94     | 6,7%         |
|                                                                                 | 31-40         | 115      | 14,1%        | 86       | 14,5%        | 201    | 14,3%        |
|                                                                                 | 41-50         | 130      | 16,0%        | 114      | 19,2%        | 244    | 17,3%        |
|                                                                                 | 51-60         | 199      | <b>24,5%</b> | 158      | <b>26,6%</b> | 357    | <b>25,4%</b> |
|                                                                                 | 61-70         | 173      | 21,3%        | 115      | 19,3%        | 288    | 20,5%        |
|                                                                                 | 71-80         | 85       | 10,5%        | 49       | 8,2%         | 134    | 9,5%         |
|                                                                                 | 81-90         | 30       | 3,7%         | 18       | 3,0%         | 48     | 3,4%         |
|                                                                                 | ≥ 91          | <5       | *            | <5       | *            | <5     | *            |
|                                                                                 | Gesamt        | 813      | 100,0%       | 595      | 100,0%       | 1.408  | 100,0%       |
| Coxibe (COX-2-Hemmer)                                                           | 1-10          | 0        | 0,0%         | 0        | 0,0%         | 0      | 0,0%         |
|                                                                                 | 11-20         | <5       | *            | 0        | 0,0%         | <5     | *            |
|                                                                                 | 21-30         | 7        | 10,6%        | <5       | *            | 8      | 7,6%         |
|                                                                                 | 31-40         | 6        | 9,1%         | <5       | *            | 8      | 7,6%         |
|                                                                                 | 41-50         | 12       | 18,2%        | 7        | 17,9%        | 19     | 18,1%        |
|                                                                                 | 51-60         | 19       | <b>28,8%</b> | 9        | 23,1%        | 28     | <b>26,7%</b> |
|                                                                                 | 61-70         | 7        | 10,6%        | 14       | <b>35,9%</b> | 21     | 20,0%        |
|                                                                                 | 71-80         | 8        | 12,1%        | <5       | *            | 12     | 11,4%        |
|                                                                                 | 81-90         | 6        | 9,1%         | <5       | *            | 8      | 7,6%         |
|                                                                                 | ≥ 91          | 0        | 0,0%         | 0        | 0,0%         | 0      | 0,0%         |
|                                                                                 | Gesamt        | 66       | 100,0%       | 39       | 100,0%       | 105    | 100,0%       |
| Nicht-steroidale Antipsoriatika zur dermalen Anwendung als Monotherapie         | 1-10          | 0        | 0,0%         | 0        | 0,0%         | 0      | 0,0%         |
|                                                                                 | 11-20         | 0        | 0,0%         | 0        | 0,0%         | 0      | 0,0%         |
|                                                                                 | 21-30         | 5        | 13,5%        | <5       | *            | 6      | 9,5%         |
|                                                                                 | 31-40         | <5       | *            | 5        | 19,2%        | 8      | 12,7%        |
|                                                                                 | 41-50         | <5       | *            | <5       | *            | 5      | 7,9%         |
|                                                                                 | 51-60         | 9        | 24,3%        | 5        | 19,2%        | 14     | 22,2%        |
|                                                                                 | 61-70         | 10       | <b>27,0%</b> | 9        | <b>34,6%</b> | 19     | <b>30,2%</b> |
|                                                                                 | 71-80         | 8        | 21,6%        | <5       | *            | 10     | 15,9%        |
|                                                                                 | 81-90         | 0        | 0,0%         | <5       | *            | <5     | *            |
|                                                                                 | ≥ 91          | 0        | 0,0%         | 0        | 0,0%         | 0      | 0,0%         |
|                                                                                 | Gesamt        | 37       | 100,0%       | 26       | 100,0%       | 63     | 100,0%       |
| Nicht-steroidale Antipsoriatika zur dermalen Anwendung als Kombinationstherapie | 1-10          | 0        | 0,0%         | 0        | 0,0%         | 0      | 0,0%         |
|                                                                                 | 11-20         | <5       | *            | <5       | *            | <5     | *            |
|                                                                                 | 21-30         | 7        | 14,3%        | <5       | *            | 9      | 10,7%        |
|                                                                                 | 31-40         | <5       | *            | 6        | 17,1%        | 10     | 11,9%        |
|                                                                                 | 41-50         | 11       | 22,4%        | 13       | <b>37,1%</b> | 24     | <b>28,6%</b> |
|                                                                                 | 51-60         | 13       | <b>26,5%</b> | <5       | *            | 17     | 20,2%        |
|                                                                                 | 61-70         | 9        | 18,4%        | 7        | 20,0%        | 16     | 19,0%        |
|                                                                                 | 71-80         | <5       | *            | <5       | *            | <5     | *            |
|                                                                                 | 81-90         | 0        | 0,0%         | 0        | 0,0%         | 0      | 0,0%         |

| Therapiegruppe | Altersgruppen | Weiblich |        | Männlich |        | Gesamt |        |
|----------------|---------------|----------|--------|----------|--------|--------|--------|
|                |               | n        | %      | n        | %      | n      | %      |
|                | ≥ 91          | 0        | 0,0%   | 0        | 0,0%   | 0      | 0,0%   |
|                | Gesamt        | 49       | 100,0% | 35       | 100,0% | 84     | 100,0% |

\* Werte können aus Datenschutzgründen nicht ausgewiesen werden

Tab. S5: Demografie der Therapieformen – Colitis ulcerosa

| Therapiegruppe                                       | Altersgruppen | Weiblich |              | Männlich |              | Gesamt |              |
|------------------------------------------------------|---------------|----------|--------------|----------|--------------|--------|--------------|
|                                                      |               | n        | %            | n        | %            | n      | %            |
| Biologika/JAKi                                       | 1-10          | <5       | *            | <5       | *            | 7      | 0,5%         |
|                                                      | 11-20         | 37       | 5,5%         | 42       | 5,4%         | 79     | 5,4%         |
|                                                      | 21-30         | 130      | 19,3%        | 139      | 17,9%        | 269    | 18,5%        |
|                                                      | 31-40         | 150      | <b>22,2%</b> | 147      | 18,9%        | 297    | <b>20,5%</b> |
|                                                      | 41-50         | 124      | 18,4%        | 145      | 18,7%        | 269    | 18,5%        |
|                                                      | 51-60         | 129      | 19,1%        | 162      | <b>20,8%</b> | 291    | 20,0%        |
|                                                      | 61-70         | 72       | 10,7%        | 95       | 12,2%        | 167    | 11,5%        |
|                                                      | 71-80         | 26       | 3,9%         | 37       | 4,8%         | 63     | 4,3%         |
|                                                      | 81-90         | <5       | *            | 6        | 0,8%         | 10     | 0,7%         |
|                                                      | ≥ 91          | 0        | 0,0%         | 0        | 0,0%         | 0      | 0,0%         |
|                                                      | Gesamt        | 675      | 100,0%       | 777      | 100,0%       | 1.452  | 100,0%       |
| csDMARDs & klassische systemische Therapien          | 1-10          | 15       | 0,4%         | 16       | 0,4%         | 31     | 0,4%         |
|                                                      | 11-20         | 122      | 3,2%         | 111      | 2,6%         | 233    | 2,8%         |
|                                                      | 21-30         | 356      | 9,2%         | 370      | 8,5%         | 726    | 8,9%         |
|                                                      | 31-40         | 612      | 15,9%        | 607      | 14,0%        | 1.219  | 14,9%        |
|                                                      | 41-50         | 646      | 16,8%        | 724      | 16,7%        | 1.370  | 16,7%        |
|                                                      | 51-60         | 820      | <b>21,3%</b> | 995      | <b>22,9%</b> | 1.815  | <b>22,2%</b> |
|                                                      | 61-70         | 627      | 16,3%        | 782      | 18,0%        | 1.409  | 17,2%        |
|                                                      | 71-80         | 394      | 10,2%        | 517      | 11,9%        | 911    | 11,1%        |
|                                                      | 81-90         | 238      | 6,2%         | 212      | 4,9%         | 450    | 5,5%         |
|                                                      | ≥ 91          | 19       | 0,5%         | 10       | 0,2%         | 29     | 0,4%         |
|                                                      | Gesamt        | 3.849    | 100,0%       | 4.344    | 100,0%       | 8.193  | 100,0%       |
| Systemische Corticosteroide als Monotherapie         | 1-10          | <5       | *            | <5       | *            | <5     | *            |
|                                                      | 11-20         | 0        | 0,0%         | <5       | *            | <5     | *            |
|                                                      | 21-30         | 16       | 3,2%         | 21       | 4,5%         | 37     | 3,8%         |
|                                                      | 31-40         | 35       | 7,1%         | 31       | 6,6%         | 66     | 6,8%         |
|                                                      | 41-50         | 56       | 11,3%        | 54       | 11,5%        | 110    | 11,4%        |
|                                                      | 51-60         | 114      | 23,0%        | 122      | <b>26,0%</b> | 236    | <b>24,5%</b> |
|                                                      | 61-70         | 117      | <b>23,6%</b> | 83       | 17,7%        | 200    | 20,7%        |
|                                                      | 71-80         | 102      | 20,6%        | 105      | 22,3%        | 207    | 21,5%        |
|                                                      | 81-90         | 48       | 9,7%         | 49       | 10,4%        | 97     | 10,1%        |
|                                                      | ≥ 91          | 6        | 1,2%         | <5       | *            | 8      | 0,8%         |
|                                                      | Gesamt        | 495      | 100,0%       | 470      | 100,0%       | 965    | 100,0%       |
| Systemische Corticosteroide als Kombinationstherapie | 1-10          | 7        | 0,6%         | 10       | 0,7%         | 17     | 0,7%         |
|                                                      | 11-20         | 59       | 4,9%         | 56       | 4,0%         | 115    | 4,4%         |
|                                                      | 21-30         | 150      | 12,5%        | 168      | 12,0%        | 318    | 12,2%        |
|                                                      | 31-40         | 174      | 14,5%        | 188      | 13,4%        | 362    | 13,9%        |
|                                                      | 41-50         | 192      | 16,0%        | 218      | 15,6%        | 410    | 15,8%        |
|                                                      | 51-60         | 247      | <b>20,6%</b> | 329      | <b>23,5%</b> | 576    | <b>22,1%</b> |
|                                                      | 61-70         | 185      | 15,4%        | 228      | 16,3%        | 413    | 15,9%        |
|                                                      | 71-80         | 109      | 9,1%         | 140      | 10,0%        | 249    | 9,6%         |
|                                                      | 81-90         | 74       | 6,2%         | 62       | 4,4%         | 136    | 5,2%         |

| Therapiegruppe                                                                  | Altersgruppen | Weiblich |              | Männlich |              | Gesamt |              |
|---------------------------------------------------------------------------------|---------------|----------|--------------|----------|--------------|--------|--------------|
|                                                                                 |               | n        | %            | n        | %            | n      | %            |
|                                                                                 | ≥ 91          | <5       | *            | <5       | *            | 6      | 0,2%         |
|                                                                                 | Gesamt        | 1.201    | 100,0%       | 1.401    | 100,0%       | 2.602  | 100,0%       |
| NSAR – nichtsteroidales Antirheumatikum                                         | 1-10          | 5        | 0,6%         | 7        | 1,0%         | 12     | 0,8%         |
|                                                                                 | 11-20         | 11       | 1,4%         | 6        | 0,9%         | 17     | 1,2%         |
|                                                                                 | 21-30         | 28       | 3,6%         | 30       | 4,3%         | 58     | 3,9%         |
|                                                                                 | 31-40         | 52       | 6,7%         | 63       | 9,1%         | 115    | 7,8%         |
|                                                                                 | 41-50         | 114      | 14,6%        | 100      | 14,5%        | 214    | 14,5%        |
|                                                                                 | 51-60         | 181      | <b>23,2%</b> | 187      | <b>27,0%</b> | 368    | <b>25,0%</b> |
|                                                                                 | 61-70         | 180      | 23,1%        | 155      | 22,4%        | 335    | 22,8%        |
|                                                                                 | 71-80         | 133      | 17,1%        | 100      | 14,5%        | 233    | 15,8%        |
|                                                                                 | 81-90         | 69       | 8,8%         | 42       | 6,1%         | 111    | 7,5%         |
|                                                                                 | ≥ 91          | 7        | 0,9%         | <5       | *            | 9      | 0,6%         |
|                                                                                 | Gesamt        | 780      | 100,0%       | 692      | 100,0%       | 1.472  | 100,0%       |
| Coxibe (COX-2-Hemmer)                                                           | 1-10          | 0        | 0,0%         | 0        | 0,0%         | 0      | 0,0%         |
|                                                                                 | 11-20         | 0        | 0,0%         | 0        | 0,0%         | 0      | 0,0%         |
|                                                                                 | 21-30         | <5       | *            | <5       | *            | <5     | *            |
|                                                                                 | 31-40         | 9        | 11,7%        | <5       | *            | 13     | 9,8%         |
|                                                                                 | 41-50         | 11       | 14,3%        | 6        | 10,9%        | 17     | 12,9%        |
|                                                                                 | 51-60         | 18       | <b>23,4%</b> | 23       | <b>41,8%</b> | 41     | <b>31,1%</b> |
|                                                                                 | 61-70         | 10       | 13,0%        | 6        | 10,9%        | 16     | 12,1%        |
|                                                                                 | 71-80         | 16       | 20,8%        | 8        | 14,5%        | 24     | 18,2%        |
|                                                                                 | 81-90         | 12       | 15,6%        | 6        | 10,9%        | 18     | 13,6%        |
|                                                                                 | ≥ 91          | 0        | 0,0%         | 0        | 0,0%         | 0      | 0,0%         |
|                                                                                 | Gesamt        | 77       | 100,0%       | 55       | 100,0%       | 132    | 100,0%       |
| Nicht-steroidale Antipsoriatika zur dermalen Anwendung als Monotherapie         | 1-10          | 0        | 0,0%         | 0        | 0,0%         | 0      | 0,0%         |
|                                                                                 | 11-20         | 0        | 0,0%         | 0        | 0,0%         | 0      | 0,0%         |
|                                                                                 | 21-30         | <5       | *            | <5       | *            | <5     | *            |
|                                                                                 | 31-40         | <5       | *            | <5       | *            | <5     | *            |
|                                                                                 | 41-50         | 6        | 20,0%        | 5        | 23,8%        | 11     | 21,6%        |
|                                                                                 | 51-60         | 7        | <b>23,3%</b> | 5        | 23,8%        | 12     | 23,5%        |
|                                                                                 | 61-70         | 6        | 20,0%        | 7        | <b>33,3%</b> | 13     | <b>25,5%</b> |
|                                                                                 | 71-80         | 7        | <b>23,3%</b> | <5       | *            | 9      | 17,6%        |
|                                                                                 | 81-90         | <5       | *            | 0        | 0,0%         | <5     | *            |
|                                                                                 | ≥ 91          | <5       | *            | 0        | 0,0%         | <5     | *            |
|                                                                                 | Gesamt        | 30       | 100,0%       | 21       | 100,0%       | 51     | 100,0%       |
| Nicht-steroidale Antipsoriatika zur dermalen Anwendung als Kombinationstherapie | 1-10          | 0        | 0,0%         | 0        | 0,0%         | 0      | 0,0%         |
|                                                                                 | 11-20         | <5       | *            | <5       | *            | <5     | *            |
|                                                                                 | 21-30         | <5       | *            | <5       | *            | 8      | 10,1%        |
|                                                                                 | 31-40         | 8        | 18,6%        | 6        | 16,7%        | 14     | 17,7%        |
|                                                                                 | 41-50         | <5       | *            | 6        | 16,7%        | 10     | 12,7%        |
|                                                                                 | 51-60         | 9        | 20,9%        | 9        | <b>25,0%</b> | 18     | <b>22,8%</b> |
|                                                                                 | 61-70         | 12       | <b>27,9%</b> | 6        | 16,7%        | 18     | <b>22,8%</b> |
|                                                                                 | 71-80         | <5       | *            | <5       | *            | 7      | 8,9%         |
|                                                                                 | 81-90         | <5       | *            | 0        | 0,0%         | <5     | *            |

| Therapiegruppe | Altersgruppen | Weiblich |        | Männlich |        | Gesamt |        |
|----------------|---------------|----------|--------|----------|--------|--------|--------|
|                |               | n        | %      | n        | %      | n      | %      |
|                | ≥ 91          | 0        | 0,0%   | 0        | 0,0%   | 0      | 0,0%   |
|                | Gesamt        | 43       | 100,0% | 36       | 100,0% | 79     | 100,0% |

\* Werte können aus Datenschutzgründen nicht ausgewiesen werden

Tab. S6: Demografie der Therapieformen – Psoriasis

| Therapiegruppe                                       | Altersgruppen | Weiblich |              | Männlich |              | Gesamt |              |
|------------------------------------------------------|---------------|----------|--------------|----------|--------------|--------|--------------|
|                                                      |               | n        | %            | n        | %            | n      | %            |
| Biologika/JAKi                                       | 1-10          | <5       | *            | <5       | *            | 5      | 0,2%         |
|                                                      | 11-20         | 36       | 2,5%         | 13       | 0,7%         | 49     | 1,5%         |
|                                                      | 21-30         | 89       | 6,2%         | 107      | 5,6%         | 196    | 5,9%         |
|                                                      | 31-40         | 181      | 12,6%        | 303      | 16,0%        | 484    | 14,5%        |
|                                                      | 41-50         | 231      | 16,1%        | 450      | 23,8%        | 681    | 20,5%        |
|                                                      | 51-60         | 413      | <b>28,8%</b> | 578      | <b>30,5%</b> | 991    | <b>29,8%</b> |
|                                                      | 61-70         | 329      | 22,9%        | 317      | 16,7%        | 646    | 19,4%        |
|                                                      | 71-80         | 128      | 8,9%         | 103      | 5,4%         | 231    | 6,9%         |
|                                                      | 81-90         | 23       | 1,6%         | 22       | 1,2%         | 45     | 1,4%         |
|                                                      | ≥ 91          | <5       | *            | 0        | 0,0%         | <5     | *            |
|                                                      | Gesamt        | 1.435    | 100,0%       | 1.894    | 100,0%       | 3.329  | 100,0%       |
| csDMARDs & klassische systemische Therapien          | 1-10          | <5       | *            | <5       | *            | <5     | *            |
|                                                      | 11-20         | 12       | 0,4%         | 20       | 0,6%         | 32     | 0,5%         |
|                                                      | 21-30         | 99       | 3,0%         | 132      | 4,1%         | 231    | 3,5%         |
|                                                      | 31-40         | 221      | 6,6%         | 288      | 9,0%         | 509    | 7,8%         |
|                                                      | 41-50         | 420      | 12,6%        | 524      | 16,3%        | 944    | 14,4%        |
|                                                      | 51-60         | 891      | 26,8%        | 956      | <b>29,8%</b> | 1.847  | <b>28,2%</b> |
|                                                      | 61-70         | 972      | <b>29,2%</b> | 731      | 22,8%        | 1.703  | 26,0%        |
|                                                      | 71-80         | 542      | 16,3%        | 449      | 14,0%        | 991    | 15,2%        |
|                                                      | 81-90         | 153      | 4,6%         | 102      | 3,2%         | 255    | 3,9%         |
|                                                      | ≥ 91          | 15       | 0,5%         | 10       | 0,3%         | 25     | 0,4%         |
|                                                      | Gesamt        | 3.328    | 100,0%       | 3.213    | 100,0%       | 6.541  | 100,0%       |
| Systemische Corticosteroide als Monotherapie         | 1-10          | <5       | *            | 10       | 0,3%         | 12     | 0,2%         |
|                                                      | 11-20         | 24       | 0,6%         | 16       | 0,5%         | 40     | 0,6%         |
|                                                      | 21-30         | 74       | 2,0%         | 62       | 1,8%         | 136    | 1,9%         |
|                                                      | 31-40         | 204      | 5,5%         | 152      | 4,4%         | 356    | 5,0%         |
|                                                      | 41-50         | 333      | 9,0%         | 360      | 10,4%        | 693    | 9,7%         |
|                                                      | 51-60         | 796      | 21,6%        | 791      | 22,8%        | 1.587  | 22,2%        |
|                                                      | 61-70         | 988      | <b>26,8%</b> | 909      | <b>26,2%</b> | 1.897  | <b>26,5%</b> |
|                                                      | 71-80         | 774      | 21,0%        | 771      | 22,2%        | 1.545  | 21,6%        |
|                                                      | 81-90         | 439      | 11,9%        | 362      | 10,4%        | 801    | 11,2%        |
|                                                      | ≥ 91          | 59       | 1,6%         | 33       | 1,0%         | 92     | 1,3%         |
|                                                      | Gesamt        | 3.693    | 100,0%       | 3.466    | 100,0%       | 7.159  | 100,0%       |
| Systemische Corticosteroide als Kombinationstherapie | 1-10          | <5       | *            | 0        | 0,0%         | <5     | *            |
|                                                      | 11-20         | <5       | *            | 6        | 0,6%         | 10     | 0,4%         |
|                                                      | 21-30         | 33       | 2,4%         | 28       | 2,6%         | 61     | 2,5%         |
|                                                      | 31-40         | 85       | 6,2%         | 68       | 6,3%         | 153    | 6,2%         |
|                                                      | 41-50         | 173      | 12,5%        | 160      | 14,8%        | 333    | 13,5%        |
|                                                      | 51-60         | 375      | 27,2%        | 330      | <b>30,6%</b> | 705    | <b>28,7%</b> |
|                                                      | 61-70         | 383      | <b>27,8%</b> | 257      | 23,8%        | 640    | 26,0%        |
|                                                      | 71-80         | 247      | 17,9%        | 185      | 17,1%        | 432    | 17,6%        |
|                                                      | 81-90         | 73       | 5,3%         | 43       | 4,0%         | 116    | 4,7%         |

| Therapiegruppe                                                                  | Altersgruppen | Weiblich |        | Männlich |        | Gesamt |        |
|---------------------------------------------------------------------------------|---------------|----------|--------|----------|--------|--------|--------|
|                                                                                 |               | n        | %      | n        | %      | n      | %      |
|                                                                                 | ≥ 91          | 6        | 0,4%   | <5       | *      | 9      | 0,4%   |
|                                                                                 | Gesamt        | 1.380    | 100,0% | 1.080    | 100,0% | 2.460  | 100,0% |
| NSAR – nichtsteroidales Antirheumatikum                                         | 1-10          | 56       | 0,7%   | 32       | 0,4%   | 88     | 0,5%   |
|                                                                                 | 11-20         | 108      | 1,3%   | 83       | 1,0%   | 191    | 1,2%   |
|                                                                                 | 21-30         | 291      | 3,6%   | 256      | 3,1%   | 547    | 3,3%   |
|                                                                                 | 31-40         | 592      | 7,3%   | 663      | 8,0%   | 1.255  | 7,7%   |
|                                                                                 | 41-50         | 1.004    | 12,4%  | 1.122    | 13,6%  | 2.126  | 13,0%  |
|                                                                                 | 51-60         | 1.897    | 23,5%  | 2.190    | 26,5%  | 4.087  | 25,0%  |
|                                                                                 | 61-70         | 2.070    | 25,6%  | 2.057    | 24,9%  | 4.127  | 25,2%  |
|                                                                                 | 71-80         | 1.393    | 17,2%  | 1.306    | 15,8%  | 2.699  | 16,5%  |
|                                                                                 | 81-90         | 609      | 7,5%   | 532      | 6,4%   | 1.141  | 7,0%   |
|                                                                                 | ≥ 91          | 62       | 0,8%   | 28       | 0,3%   | 90     | 0,6%   |
|                                                                                 | Gesamt        | 8.082    | 100,0% | 8.269    | 100,0% | 16.351 | 100,0% |
| Coxibe (COX-2-Hemmer)                                                           | 1-10          | 0        | 0,0%   | 0        | 0,0%   | 0      | 0,0%   |
|                                                                                 | 11-20         | <5       | *      | <5       | *      | <5     | *      |
|                                                                                 | 21-30         | 8        | 1,4%   | 5        | 1,1%   | 13     | 1,2%   |
|                                                                                 | 31-40         | 30       | 5,1%   | 29       | 6,2%   | 59     | 5,6%   |
|                                                                                 | 41-50         | 46       | 7,8%   | 53       | 11,4%  | 99     | 9,4%   |
|                                                                                 | 51-60         | 139      | 23,7%  | 131      | 28,1%  | 270    | 25,6%  |
|                                                                                 | 61-70         | 158      | 26,9%  | 123      | 26,4%  | 281    | 26,7%  |
|                                                                                 | 71-80         | 127      | 21,6%  | 80       | 17,2%  | 207    | 19,7%  |
|                                                                                 | 81-90         | 68       | 11,6%  | 41       | 8,8%   | 109    | 10,4%  |
|                                                                                 | ≥ 91          | 8        | 1,4%   | <5       | *      | 11     | 1,0%   |
|                                                                                 | Gesamt        | 587      | 100,0% | 466      | 100,0% | 1.053  | 100,0% |
| Nicht-steroidale Antipsoriatika zur dermalen Anwendung als Monotherapie         | 1-10          | 16       | 0,3%   | 11       | 0,2%   | 27     | 0,2%   |
|                                                                                 | 11-20         | 108      | 2,3%   | 106      | 1,7%   | 214    | 2,0%   |
|                                                                                 | 21-30         | 338      | 7,2%   | 372      | 6,0%   | 710    | 6,5%   |
|                                                                                 | 31-40         | 514      | 10,9%  | 738      | 11,8%  | 1.252  | 11,4%  |
|                                                                                 | 41-50         | 622      | 13,2%  | 1.013    | 16,2%  | 1.635  | 14,9%  |
|                                                                                 | 51-60         | 1.099    | 23,3%  | 1.550    | 24,9%  | 2.649  | 24,2%  |
|                                                                                 | 61-70         | 1.075    | 22,8%  | 1.389    | 22,3%  | 2.464  | 22,5%  |
|                                                                                 | 71-80         | 663      | 14,1%  | 807      | 12,9%  | 1.470  | 13,4%  |
|                                                                                 | 81-90         | 246      | 5,2%   | 238      | 3,8%   | 484    | 4,4%   |
|                                                                                 | ≥ 91          | 27       | 0,6%   | 12       | 0,2%   | 39     | 0,4%   |
|                                                                                 | Gesamt        | 4.708    | 100,0% | 6.236    | 100,0% | 10.944 | 100,0% |
| Nicht-steroidale Antipsoriatika zur dermalen Anwendung als Kombinationstherapie | 1-10          | <5       | *      | 0        | 0,0%   | <5     | *      |
|                                                                                 | 11-20         | 17       | 1,9%   | 13       | 1,0%   | 30     | 1,4%   |
|                                                                                 | 21-30         | 49       | 5,5%   | 88       | 6,7%   | 137    | 6,2%   |
|                                                                                 | 31-40         | 98       | 11,1%  | 183      | 14,0%  | 281    | 12,8%  |
|                                                                                 | 41-50         | 139      | 15,7%  | 303      | 23,1%  | 442    | 20,2%  |
|                                                                                 | 51-60         | 260      | 29,4%  | 362      | 27,7%  | 622    | 28,4%  |
|                                                                                 | 61-70         | 216      | 24,4%  | 226      | 17,3%  | 442    | 20,2%  |
|                                                                                 | 71-80         | 87       | 9,8%   | 111      | 8,5%   | 198    | 9,0%   |
|                                                                                 | 81-90         | 14       | 1,6%   | 22       | 1,7%   | 36     | 1,6%   |

| Therapiegruppe | Altersgruppen | Weiblich |        | Männlich |        | Gesamt |        |
|----------------|---------------|----------|--------|----------|--------|--------|--------|
|                |               | n        | %      | n        | %      | n      | %      |
|                | ≥ 91          | <5       | *      | <5       | *      | <5     | *      |
|                | Gesamt        | 884      | 100,0% | 1.309    | 100,0% | 2.193  | 100,0% |

\* Werte können aus Datenschutzgründen nicht ausgewiesen werden

Tab. S7: Demografie der Therapieformen – Psoriasis Arthritis

| Therapiegruppe                                       | Altersgruppen | Weiblich |              | Männlich |              | Gesamt |              |
|------------------------------------------------------|---------------|----------|--------------|----------|--------------|--------|--------------|
|                                                      |               | n        | %            | n        | %            | n      | %            |
| Biologika/JAKi                                       | 1-10          | <5       | *            | 0        | 0,0%         | <5     | *            |
|                                                      | 11-20         | 18       | 1,6%         | 7        | 0,6%         | 25     | 1,1%         |
|                                                      | 21-30         | 61       | 5,6%         | 48       | 4,2%         | 109    | 4,9%         |
|                                                      | 31-40         | 125      | 11,5%        | 152      | 13,3%        | 277    | 12,4%        |
|                                                      | 41-50         | 192      | 17,6%        | 275      | 24,0%        | 467    | 20,9%        |
|                                                      | 51-60         | 354      | <b>32,4%</b> | 390      | <b>34,1%</b> | 744    | <b>33,3%</b> |
|                                                      | 61-70         | 246      | 22,5%        | 207      | 18,1%        | 453    | 20,3%        |
|                                                      | 71-80         | 84       | 7,7%         | 59       | 5,2%         | 143    | 6,4%         |
|                                                      | 81-90         | 8        | 0,7%         | 6        | 0,5%         | 14     | 0,6%         |
|                                                      | ≥ 91          | <5       | *            | 0        | 0,0%         | <5     | *            |
|                                                      | Gesamt        | 1.091    | 100,0%       | 1.144    | 100,0%       | 2.235  | 100,0%       |
| csDMARDs & klassische systemische Therapien          | 1-10          | 0        | 0,0%         | 0        | 0,0%         | 0      | 0,0%         |
|                                                      | 11-20         | 5        | 0,2%         | 6        | 0,4%         | 11     | 0,3%         |
|                                                      | 21-30         | 51       | 2,4%         | 38       | 2,3%         | 89     | 2,4%         |
|                                                      | 31-40         | 111      | 5,3%         | 98       | 6,0%         | 209    | 5,6%         |
|                                                      | 41-50         | 283      | 13,4%        | 255      | 15,7%        | 538    | 14,4%        |
|                                                      | 51-60         | 599      | 28,4%        | 537      | <b>33,0%</b> | 1.136  | <b>30,4%</b> |
|                                                      | 61-70         | 630      | <b>29,9%</b> | 423      | 26,0%        | 1.053  | 28,2%        |
|                                                      | 71-80         | 329      | 15,6%        | 229      | 14,1%        | 558    | 14,9%        |
|                                                      | 81-90         | 94       | 4,5%         | 42       | 2,6%         | 136    | 3,6%         |
|                                                      | ≥ 91          | <5       | *            | 0        | 0,0%         | <5     | *            |
|                                                      | Gesamt        | 2.106    | 100,0%       | 1.628    | 100,0%       | 3.734  | 100,0%       |
| Systemische Corticosteroide als Monotherapie         | 1-10          | <5       | *            | 0        | 0,0%         | <5     | *            |
|                                                      | 11-20         | <5       | *            | <5       | *            | <5     | *            |
|                                                      | 21-30         | 12       | 1,8%         | 9        | 1,9%         | 21     | 1,8%         |
|                                                      | 31-40         | 41       | 6,0%         | 15       | 3,1%         | 56     | 4,8%         |
|                                                      | 41-50         | 68       | 10,0%        | 45       | 9,4%         | 113    | 9,7%         |
|                                                      | 51-60         | 178      | 26,1%        | 125      | <b>26,2%</b> | 303    | 26,1%        |
|                                                      | 61-70         | 184      | <b>27,0%</b> | 124      | 25,9%        | 308    | <b>26,6%</b> |
|                                                      | 71-80         | 132      | 19,4%        | 103      | 21,5%        | 235    | 20,3%        |
|                                                      | 81-90         | 61       | 9,0%         | 53       | 11,1%        | 114    | 9,8%         |
|                                                      | ≥ 91          | <5       | *            | <5       | *            | 5      | 0,4%         |
|                                                      | Gesamt        | 681      | 100,0%       | 478      | 100,0%       | 1.159  | 100,0%       |
| Systemische Corticosteroide als Kombinationstherapie | 1-10          | 0        | 0,0%         | 0        | 0,0%         | 0      | 0,0%         |
|                                                      | 11-20         | <5       | *            | <5       | *            | 7      | 0,3%         |
|                                                      | 21-30         | 36       | 2,9%         | 23       | 2,9%         | 59     | 2,9%         |
|                                                      | 31-40         | 80       | 6,5%         | 56       | 7,0%         | 136    | 6,7%         |
|                                                      | 41-50         | 166      | 13,6%        | 137      | 17,0%        | 303    | 14,9%        |
|                                                      | 51-60         | 368      | <b>30,0%</b> | 258      | <b>32,0%</b> | 626    | <b>30,8%</b> |
|                                                      | 61-70         | 329      | 26,9%        | 201      | 25,0%        | 530    | 26,1%        |
|                                                      | 71-80         | 180      | 14,7%        | 106      | 13,2%        | 286    | 14,1%        |
|                                                      | 81-90         | 60       | 4,9%         | 21       | 2,6%         | 81     | 4,0%         |

| Therapiegruppe                                                                  | Altersgruppen | Weiblich |              | Männlich |              | Gesamt |              |
|---------------------------------------------------------------------------------|---------------|----------|--------------|----------|--------------|--------|--------------|
|                                                                                 |               | n        | %            | n        | %            | n      | %            |
|                                                                                 | ≥ 91          | <5       | *            | 0        | 0,0%         | <5     | *            |
|                                                                                 | Gesamt        | 1.225    | 100,0%       | 805      | 100,0%       | 2.030  | 100,0%       |
| NSAR – nichtsteroidales Antirheumatikum                                         | 1-10          | <5       | *            | <5       | *            | 6      | 0,4%         |
|                                                                                 | 11-20         | 15       | 1,7%         | <5       | *            | 18     | 1,2%         |
|                                                                                 | 21-30         | 20       | 2,3%         | 10       | 1,7%         | 30     | 2,0%         |
|                                                                                 | 31-40         | 53       | 6,0%         | 33       | 5,6%         | 86     | 5,8%         |
|                                                                                 | 41-50         | 120      | 13,6%        | 102      | 17,3%        | 222    | 15,1%        |
|                                                                                 | 51-60         | 243      | 27,6%        | 173      | <b>29,3%</b> | 416    | <b>28,3%</b> |
|                                                                                 | 61-70         | 249      | <b>28,2%</b> | 163      | 27,6%        | 412    | 28,0%        |
|                                                                                 | 71-80         | 138      | 15,6%        | 79       | 13,4%        | 217    | 14,7%        |
|                                                                                 | 81-90         | 36       | 4,1%         | 21       | 3,6%         | 57     | 3,9%         |
|                                                                                 | ≥ 91          | 5        | 0,6%         | <5       | *            | 8      | 0,5%         |
|                                                                                 | Gesamt        | 882      | 100,0%       | 590      | 100,0%       | 1.472  | 100,0%       |
| Coxibe (COX-2-Hemmer)                                                           | 1-10          | 0        | 0,0%         | 0        | 0,0%         | 0      | 0,0%         |
|                                                                                 | 11-20         | <5       | *            | 0        | 0,0%         | <5     | *            |
|                                                                                 | 21-30         | <5       | *            | 0        | 0,0%         | <5     | *            |
|                                                                                 | 31-40         | 11       | 7,3%         | 9        | 13,0%        | 20     | 9,1%         |
|                                                                                 | 41-50         | 23       | 15,3%        | <5       | *            | 26     | 11,9%        |
|                                                                                 | 51-60         | 42       | 28,0%        | 25       | <b>36,2%</b> | 67     | <b>30,6%</b> |
|                                                                                 | 61-70         | 45       | <b>30,0%</b> | 18       | 26,1%        | 63     | 28,8%        |
|                                                                                 | 71-80         | 15       | 10,0%        | 9        | 13,0%        | 24     | 11,0%        |
|                                                                                 | 81-90         | 9        | 6,0%         | <5       | *            | 13     | 5,9%         |
|                                                                                 | ≥ 91          | <5       | *            | <5       | *            | <5     | *            |
|                                                                                 | Gesamt        | 150      | 100,0%       | 69       | 100,0%       | 219    | 100,0%       |
| Nicht-steroidale Antipsoriatika zur dermalen Anwendung als Monotherapie         | 1-10          | 0        | 0,0%         | 0        | 0,0%         | 0      | 0,0%         |
|                                                                                 | 11-20         | 5        | 1,3%         | <5       | *            | 6      | 0,7%         |
|                                                                                 | 21-30         | 10       | 2,6%         | 13       | 2,9%         | 23     | 2,7%         |
|                                                                                 | 31-40         | 29       | 7,5%         | 35       | 7,8%         | 64     | 7,6%         |
|                                                                                 | 41-50         | 43       | 11,1%        | 57       | 12,7%        | 100    | 11,9%        |
|                                                                                 | 51-60         | 100      | <b>25,8%</b> | 128      | <b>28,5%</b> | 228    | <b>27,2%</b> |
|                                                                                 | 61-70         | 99       | 25,5%        | 122      | 27,2%        | 221    | 26,4%        |
|                                                                                 | 71-80         | 83       | 21,4%        | 67       | 14,9%        | 150    | 17,9%        |
|                                                                                 | 81-90         | 18       | 4,6%         | 26       | 5,8%         | 44     | 5,3%         |
|                                                                                 | ≥ 91          | <5       | *            | 0        | 0,0%         | <5     | *            |
|                                                                                 | Gesamt        | 388      | 100,0%       | 449      | 100,0%       | 837    | 100,0%       |
| Nicht-steroidale Antipsoriatika zur dermalen Anwendung als Kombinationstherapie | 1-10          | <5       | *            | 0        | 0,0%         | <5     | *            |
|                                                                                 | 11-20         | <5       | *            | <5       | *            | <5     | *            |
|                                                                                 | 21-30         | 15       | 4,1%         | 13       | 2,8%         | 28     | 3,4%         |
|                                                                                 | 31-40         | 39       | 10,6%        | 60       | 13,0%        | 99     | 11,9%        |
|                                                                                 | 41-50         | 58       | 15,8%        | 113      | 24,4%        | 171    | 20,6%        |
|                                                                                 | 51-60         | 107      | <b>29,2%</b> | 144      | <b>31,1%</b> | 251    | <b>30,2%</b> |
|                                                                                 | 61-70         | 103      | 28,1%        | 83       | 17,9%        | 186    | 22,4%        |
|                                                                                 | 71-80         | 33       | 9,0%         | 45       | 9,7%         | 78     | 9,4%         |
|                                                                                 | 81-90         | 7        | 1,9%         | <5       | *            | 11     | 1,3%         |

| Therapiegruppe | Altersgruppen | Weiblich |        | Männlich |        | Gesamt |        |
|----------------|---------------|----------|--------|----------|--------|--------|--------|
|                |               | n        | %      | n        | %      | n      | %      |
|                | ≥ 91          | <5       | *      | 0        | 0,0%   | <5     | *      |
|                | Gesamt        | 367      | 100,0% | 463      | 100,0% | 830    | 100,0% |

\* Werte können aus Datenschutzgründen nicht ausgewiesen werden

Tab. S8: Demografie der Therapieformen – Spondylitis ankylosans

| Therapiegruppe                                       | Altersgruppen | Weiblich |              | Männlich |              | Gesamt |              |
|------------------------------------------------------|---------------|----------|--------------|----------|--------------|--------|--------------|
|                                                      |               | n        | %            | n        | %            | n      | %            |
| Biologika/JAKi                                       | 1-10          | 0        | 0,0%         | 0        | 0,0%         | 0      | 0,0%         |
|                                                      | 11-20         | 7        | 1,1%         | 6        | 0,6%         | 13     | 0,8%         |
|                                                      | 21-30         | 46       | 7,0%         | 97       | 9,1%         | 143    | 8,3%         |
|                                                      | 31-40         | 122      | 18,6%        | 218      | 20,5%        | 340    | 19,8%        |
|                                                      | 41-50         | 163      | 24,9%        | 280      | 26,3%        | 443    | 25,7%        |
|                                                      | 51-60         | 187      | <b>28,5%</b> | 294      | <b>27,6%</b> | 481    | <b>27,9%</b> |
|                                                      | 61-70         | 97       | 14,8%        | 122      | 11,4%        | 219    | 12,7%        |
|                                                      | 71-80         | 32       | 4,9%         | 44       | 4,1%         | 76     | 4,4%         |
|                                                      | 81-90         | <5       | *            | 5        | 0,5%         | 6      | 0,3%         |
|                                                      | ≥ 91          | 0        | 0,0%         | 0        | 0,0%         | 0      | 0,0%         |
|                                                      | Gesamt        | 655      | 100,0%       | 1.066    | 100,0%       | 1.721  | 100,0%       |
| csDMARDs & klassische systemische Therapien          | 1-10          | 0        | 0,0%         | 0        | 0,0%         | 0      | 0,0%         |
|                                                      | 11-20         | <5       | *            | <5       | *            | <5     | *            |
|                                                      | 21-30         | 24       | 4,3%         | 22       | 3,7%         | 46     | 4,0%         |
|                                                      | 31-40         | 43       | 7,6%         | 46       | 7,8%         | 89     | 7,7%         |
|                                                      | 41-50         | 96       | 17,1%        | 91       | 15,4%        | 187    | 16,2%        |
|                                                      | 51-60         | 183      | <b>32,5%</b> | 167      | <b>28,3%</b> | 350    | <b>30,4%</b> |
|                                                      | 61-70         | 139      | 24,7%        | 153      | 25,9%        | 292    | 25,3%        |
|                                                      | 71-80         | 53       | 9,4%         | 88       | 14,9%        | 141    | 12,2%        |
|                                                      | 81-90         | 22       | 3,9%         | 22       | 3,7%         | 44     | 3,8%         |
|                                                      | ≥ 91          | 0        | 0,0%         | 0        | 0,0%         | 0      | 0,0%         |
|                                                      | Gesamt        | 563      | 100,0%       | 590      | 100,0%       | 1.153  | 100,0%       |
| Systemische Corticosteroide als Monotherapie         | 1-10          | 0        | 0,0%         | 0        | 0,0%         | 0      | 0,0%         |
|                                                      | 11-20         | <5       | *            | <5       | *            | 7      | 0,5%         |
|                                                      | 21-30         | 18       | 3,2%         | 21       | 2,9%         | 39     | 3,0%         |
|                                                      | 31-40         | 34       | 6,0%         | 33       | 4,6%         | 67     | 5,2%         |
|                                                      | 41-50         | 91       | 15,9%        | 75       | 10,5%        | 166    | 12,9%        |
|                                                      | 51-60         | 161      | <b>28,2%</b> | 170      | <b>23,9%</b> | 331    | <b>25,8%</b> |
|                                                      | 61-70         | 132      | 23,1%        | 167      | 23,5%        | 299    | 23,3%        |
|                                                      | 71-80         | 94       | 16,5%        | 165      | 23,2%        | 259    | 20,2%        |
|                                                      | 81-90         | 33       | 5,8%         | 73       | 10,3%        | 106    | 8,3%         |
|                                                      | ≥ 91          | <5       | *            | 5        | 0,7%         | 9      | 0,7%         |
|                                                      | Gesamt        | 571      | 100,0%       | 712      | 100,0%       | 1.283  | 100,0%       |
| Systemische Corticosteroide als Kombinationstherapie | 1-10          | 0        | 0,0%         | 0        | 0,0%         | 0      | 0,0%         |
|                                                      | 11-20         | 0        | 0,0%         | <5       | *            | <5     | *            |
|                                                      | 21-30         | 24       | 5,3%         | 23       | 5,7%         | 47     | 5,5%         |
|                                                      | 31-40         | 47       | 10,4%        | 39       | 9,6%         | 86     | 10,1%        |
|                                                      | 41-50         | 91       | 20,2%        | 75       | 18,5%        | 166    | 19,4%        |
|                                                      | 51-60         | 136      | <b>30,2%</b> | 127      | <b>31,4%</b> | 263    | <b>30,8%</b> |
|                                                      | 61-70         | 100      | 22,2%        | 77       | 19,0%        | 177    | 20,7%        |
|                                                      | 71-80         | 40       | 8,9%         | 51       | 12,6%        | 91     | 10,6%        |
|                                                      | 81-90         | 12       | 2,7%         | 12       | 3,0%         | 24     | 2,8%         |

| Therapiegruppe                                                                  | Altersgruppen | Weiblich |              | Männlich |              | Gesamt |              |
|---------------------------------------------------------------------------------|---------------|----------|--------------|----------|--------------|--------|--------------|
|                                                                                 |               | n        | %            | n        | %            | n      | %            |
|                                                                                 | ≥ 91          | 0        | 0,0%         | 0        | 0,0%         | 0      | 0,0%         |
|                                                                                 | Gesamt        | 450      | 100,0%       | 405      | 100,0%       | 855    | 100,0%       |
| NSAR – nichtsteroidales Antirheumatikum                                         | 1-10          | 0        | 0,0%         | 0        | 0,0%         | 0      | 0,0%         |
|                                                                                 | 11-20         | <5       | *            | 8        | 0,5%         | 12     | 0,4%         |
|                                                                                 | 21-30         | 41       | 3,8%         | 52       | 3,1%         | 93     | 3,4%         |
|                                                                                 | 31-40         | 104      | 9,7%         | 146      | 8,7%         | 250    | 9,1%         |
|                                                                                 | 41-50         | 184      | 17,1%        | 250      | 14,9%        | 434    | 15,8%        |
|                                                                                 | 51-60         | 279      | <b>25,9%</b> | 437      | <b>26,1%</b> | 716    | <b>26,0%</b> |
|                                                                                 | 61-70         | 249      | 23,1%        | 368      | 22,0%        | 617    | 22,4%        |
|                                                                                 | 71-80         | 146      | 13,6%        | 287      | 17,1%        | 433    | 15,7%        |
|                                                                                 | 81-90         | 61       | 5,7%         | 118      | 7,0%         | 179    | 6,5%         |
|                                                                                 | ≥ 91          | 9        | 0,8%         | 8        | 0,5%         | 17     | 0,6%         |
|                                                                                 | Gesamt        | 1.077    | 100,0%       | 1.674    | 100,0%       | 2.751  | 100,0%       |
| Coxibe (COX-2-Hemmer)                                                           | 1-10          | 0        | 0,0%         | 0        | 0,0%         | 0      | 0,0%         |
|                                                                                 | 11-20         | 0        | 0,0%         | 0        | 0,0%         | 0      | 0,0%         |
|                                                                                 | 21-30         | 18       | 7,7%         | 24       | 7,2%         | 42     | 7,4%         |
|                                                                                 | 31-40         | 28       | 12,0%        | 60       | 18,1%        | 88     | 15,6%        |
|                                                                                 | 41-50         | 42       | 18,0%        | 57       | 17,2%        | 99     | 17,5%        |
|                                                                                 | 51-60         | 67       | <b>28,8%</b> | 89       | <b>26,8%</b> | 156    | <b>27,6%</b> |
|                                                                                 | 61-70         | 46       | 19,7%        | 58       | 17,5%        | 104    | 18,4%        |
|                                                                                 | 71-80         | 21       | 9,0%         | 31       | 9,3%         | 52     | 9,2%         |
|                                                                                 | 81-90         | 10       | 4,3%         | 12       | 3,6%         | 22     | 3,9%         |
|                                                                                 | ≥ 91          | <5       | *            | <5       | *            | <5     | *            |
|                                                                                 | Gesamt        | 233      | 100,0%       | 332      | 100,0%       | 565    | 100,0%       |
| Nicht-steroidale Antipsoriatika zur dermalen Anwendung als Monotherapie         | 1-10          | 0        | 0,0%         | 0        | 0,0%         | 0      | 0,0%         |
|                                                                                 | 11-20         | 0        | 0,0%         | 0        | 0,0%         | 0      | 0,0%         |
|                                                                                 | 21-30         | <5       | *            | <5       | *            | <5     | *            |
|                                                                                 | 31-40         | <5       | *            | <5       | *            | 5      | 6,8%         |
|                                                                                 | 41-50         | <5       | *            | 6        | 12,5%        | 9      | 12,2%        |
|                                                                                 | 51-60         | 5        | 19,2%        | 12       | 25,0%        | 17     | 23,0%        |
|                                                                                 | 61-70         | 8        | <b>30,8%</b> | 13       | <b>27,1%</b> | 21     | <b>28,4%</b> |
|                                                                                 | 71-80         | 5        | 19,2%        | 9        | 18,8%        | 14     | 18,9%        |
|                                                                                 | 81-90         | <5       | *            | <5       | *            | <5     | *            |
|                                                                                 | ≥ 91          | 0        | 0,0%         | 0        | 0,0%         | 0      | 0,0%         |
|                                                                                 | Gesamt        | 26       | 100,0%       | 48       | 100,0%       | 74     | 100,0%       |
| Nicht-steroidale Antipsoriatika zur dermalen Anwendung als Kombinationstherapie | 1-10          | 0        | 0,0%         | 0        | 0,0%         | 0      | 0,0%         |
|                                                                                 | 11-20         | 0        | 0,0%         | 0        | 0,0%         | 0      | 0,0%         |
|                                                                                 | 21-30         | 0        | 0,0%         | <5       | *            | <5     | *            |
|                                                                                 | 31-40         | <5       |              | 7        | 16,7%        | 11     | 18,6%        |
|                                                                                 | 41-50         | 5        | <b>29,4%</b> | 8        | 19,0%        | 13     | 22,0%        |
|                                                                                 | 51-60         | 5        | <b>29,4%</b> | 13       | <b>31,0%</b> | 18     | <b>30,5%</b> |
|                                                                                 | 61-70         | <5       | *            | 7        | 16,7%        | 10     | 16,9%        |
|                                                                                 | 71-80         | 0        | 0,0%         | 5        | 11,9%        | 5      | 8,5%         |
|                                                                                 | 81-90         | 0        | 0,0%         | 0        | 0,0%         | 0      | 0,0%         |

| Therapiegruppe | Altersgruppen | Weiblich |        | Männlich |        | Gesamt |        |
|----------------|---------------|----------|--------|----------|--------|--------|--------|
|                |               | n        | %      | n        | %      | n      | %      |
|                | ≥ 91          | 0        | 0,0%   | 0        | 0,0%   | 0      | 0,0%   |
|                | Gesamt        | 17       | 100,0% | 42       | 100,0% | 59     | 100,0% |

\* Werte können aus Datenschutzgründen nicht ausgewiesen werden

Tab. S9: Demografie der Therapieformen – Rheumatoide Arthritis

| Therapiegruppe                                       | Altersgruppen | Weiblich |              | Männlich |              | Gesamt |              |
|------------------------------------------------------|---------------|----------|--------------|----------|--------------|--------|--------------|
|                                                      |               | n        | %            | n        | %            | n      | %            |
| Biologika/JAKi                                       | 1-10          | 7        | 0,2%         | <5       | *            | 8      | 0,1%         |
|                                                      | 11-20         | 52       | 1,4%         | 16       | 0,9%         | 68     | 1,2%         |
|                                                      | 21-30         | 146      | 3,8%         | 55       | 3,1%         | 201    | 3,6%         |
|                                                      | 31-40         | 277      | 7,2%         | 123      | 7,0%         | 400    | 7,2%         |
|                                                      | 41-50         | 491      | 12,8%        | 257      | 14,7%        | 748    | 13,4%        |
|                                                      | 51-60         | 1.001    | 26,1%        | 584      | <b>33,4%</b> | 1.585  | <b>28,4%</b> |
|                                                      | 61-70         | 1.040    | <b>27,1%</b> | 428      | 24,5%        | 1.468  | 26,3%        |
|                                                      | 71-80         | 668      | 17,4%        | 227      | 13,0%        | 895    | 16,0%        |
|                                                      | 81-90         | 147      | 3,8%         | 58       | 3,3%         | 205    | 3,7%         |
|                                                      | ≥ 91          | <5       | *            | <5       | *            | <5     | *            |
|                                                      | Gesamt        | 3.831    | 100,0%       | 1.750    | 100,0%       | 5.581  | 100,0%       |
| csDMARDs & klassische systemische Therapien          | 1-10          | 11       | 0,1%         | <5       | *            | 14     | 0,1%         |
|                                                      | 11-20         | 24       | 0,2%         | 14       | 0,3%         | 38     | 0,2%         |
|                                                      | 21-30         | 194      | 1,7%         | 45       | 0,8%         | 239    | 1,4%         |
|                                                      | 31-40         | 434      | 3,7%         | 144      | 2,7%         | 578    | 3,4%         |
|                                                      | 41-50         | 1.053    | 9,0%         | 404      | 7,6%         | 1.457  | 8,5%         |
|                                                      | 51-60         | 2.497    | 21,3%        | 1.259    | 23,6%        | 3.756  | 22,0%        |
|                                                      | 61-70         | 3.296    | <b>28,1%</b> | 1.522    | <b>28,5%</b> | 4.818  | <b>28,2%</b> |
|                                                      | 71-80         | 2.906    | 24,8%        | 1.431    | 26,8%        | 4.337  | 25,4%        |
|                                                      | 81-90         | 1.256    | 10,7%        | 502      | 9,4%         | 1.758  | 10,3%        |
|                                                      | ≥ 91          | 70       | 0,6%         | 21       | 0,4%         | 91     | 0,5%         |
|                                                      | Gesamt        | 11.741   | 100,0%       | 5.345    | 100,0%       | 17.086 | 100,0%       |
| Systemische Corticosteroide als Monotherapie         | 1-10          | <5       | *            | <5       | *            | <5     | *            |
|                                                      | 11-20         | 7        | 0,1%         | <5       | *            | 9      | 0,1%         |
|                                                      | 21-30         | 58       | 0,9%         | 19       | 0,6%         | 77     | 0,8%         |
|                                                      | 31-40         | 159      | 2,4%         | 48       | 1,5%         | 207    | 2,1%         |
|                                                      | 41-50         | 349      | 5,2%         | 146      | 4,7%         | 495    | 5,0%         |
|                                                      | 51-60         | 999      | 14,9%        | 483      | 15,5%        | 1.482  | 15,1%        |
|                                                      | 61-70         | 1.489    | 22,2%        | 646      | 20,8%        | 2.135  | 21,7%        |
|                                                      | 71-80         | 1.957    | <b>29,1%</b> | 1.029    | <b>33,1%</b> | 2.986  | <b>30,4%</b> |
|                                                      | 81-90         | 1.529    | 22,7%        | 678      | 21,8%        | 2.207  | 22,4%        |
|                                                      | ≥ 91          | 173      | 2,6%         | 60       | 1,9%         | 233    | 2,4%         |
|                                                      | Gesamt        | 6.721    | 100,0%       | 3.112    | 100,0%       | 9.833  | 100,0%       |
| Systemische Corticosteroide als Kombinationstherapie | 1-10          | <5       | *            | <5       | *            | <5     | *            |
|                                                      | 11-20         | 25       | 0,3%         | 8        | 0,2%         | 33     | 0,3%         |
|                                                      | 21-30         | 176      | 2,0%         | 39       | 1,0%         | 215    | 1,7%         |
|                                                      | 31-40         | 363      | 4,0%         | 105      | 2,6%         | 468    | 3,6%         |
|                                                      | 41-50         | 813      | 9,1%         | 346      | 8,6%         | 1.159  | 8,9%         |
|                                                      | 51-60         | 1.947    | 21,7%        | 1.015    | 25,3%        | 2.962  | 22,8%        |
|                                                      | 61-70         | 2.459    | <b>27,4%</b> | 1.113    | <b>27,8%</b> | 3.572  | <b>27,5%</b> |
|                                                      | 71-80         | 2.255    | 25,1%        | 1.012    | 25,3%        | 3.267  | 25,2%        |
|                                                      | 81-90         | 903      | 10,1%        | 354      | 8,8%         | 1.257  | 9,7%         |

| Therapiegruppe                                                                  | Altersgruppen | Weiblich |              | Männlich |              | Gesamt |              |
|---------------------------------------------------------------------------------|---------------|----------|--------------|----------|--------------|--------|--------------|
|                                                                                 |               | n        | %            | n        | %            | n      | %            |
|                                                                                 | ≥ 91          | 32       | 0,4%         | 12       | 0,3%         | 44     | 0,3%         |
|                                                                                 | Gesamt        | 8.976    | 100,0%       | 4.005    | 100,0%       | 12.981 | 100,0%       |
|                                                                                 |               |          |              |          |              |        |              |
| NSAR – nichtsteroidales Antirheumatikum                                         | 1-10          | 9        | 0,2%         | <5       | *            | 12     | 0,2%         |
|                                                                                 | 11-20         | 16       | 0,3%         | 19       | 0,9%         | 35     | 0,5%         |
|                                                                                 | 21-30         | 89       | 1,6%         | 28       | 1,3%         | 117    | 1,5%         |
|                                                                                 | 31-40         | 173      | 3,2%         | 82       | 3,7%         | 255    | 3,3%         |
|                                                                                 | 41-50         | 407      | 7,5%         | 199      | 8,9%         | 606    | 7,9%         |
|                                                                                 | 51-60         | 1.076    | 19,8%        | 537      | 24,1%        | 1.613  | 21,0%        |
|                                                                                 | 61-70         | 1.424    | <b>26,2%</b> | 542      | 24,3%        | 1.966  | <b>25,6%</b> |
|                                                                                 | 71-80         | 1.402    | 25,8%        | 546      | <b>24,5%</b> | 1.948  | 25,4%        |
|                                                                                 | 81-90         | 745      | 13,7%        | 250      | 11,2%        | 995    | 13,0%        |
|                                                                                 | ≥ 91          | 98       | 1,8%         | 25       | 1,1%         | 123    | 1,6%         |
|                                                                                 | Gesamt        | 5.439    | 100,0%       | 2.231    | 100,0%       | 7.670  | 100,0%       |
| Coxibe (COX-2-Hemmer)                                                           | 1-10          | 0        | 0,0%         | 0        | 0,0%         | 0      | 0,0%         |
|                                                                                 | 11-20         | 0        | 0,0%         | <5       | *            | <5     | *            |
|                                                                                 | 21-30         | 9        | 1,3%         | <5       | *            | 12     | 1,3%         |
|                                                                                 | 31-40         | 23       | 3,4%         | 6        | 2,5%         | 29     | 3,2%         |
|                                                                                 | 41-50         | 66       | 9,7%         | 19       | 8,0%         | 85     | 9,3%         |
|                                                                                 | 51-60         | 134      | 19,7%        | 45       | 19,0%        | 179    | 19,5%        |
|                                                                                 | 61-70         | 164      | 24,2%        | 68       | <b>28,7%</b> | 232    | 25,3%        |
|                                                                                 | 71-80         | 169      | <b>24,9%</b> | 64       | 27,0%        | 233    | <b>25,4%</b> |
|                                                                                 | 81-90         | 96       | 14,1%        | 30       | 12,7%        | 126    | 13,8%        |
|                                                                                 | ≥ 91          | 18       | 2,7%         | <5       | *            | 19     | 2,1%         |
|                                                                                 | Gesamt        | 679      | 100,0%       | 237      | 100,0%       | 916    | 100,0%       |
| Nicht-steroidale Antipsoriatika zur dermalen Anwendung als Monotherapie         | 1-10          | 0        | 0,0%         | 0        | 0,0%         | 0      | 0,0%         |
|                                                                                 | 11-20         | <5       | *            | 0        | 0,0%         | <5     | *            |
|                                                                                 | 21-30         | <5       | *            | <5       | *            | <5     | *            |
|                                                                                 | 31-40         | <5       | *            | 9        | 6,7%         | 10     | 3,4%         |
|                                                                                 | 41-50         | 12       | 7,5%         | 12       | 8,9%         | 24     | 8,1%         |
|                                                                                 | 51-60         | 29       | 18,0%        | 23       | 17,0%        | 52     | 17,6%        |
|                                                                                 | 61-70         | 55       | <b>34,2%</b> | 39       | <b>28,9%</b> | 94     | <b>31,8%</b> |
|                                                                                 | 71-80         | 41       | 25,5%        | 35       | 25,9%        | 76     | 25,7%        |
|                                                                                 | 81-90         | 17       | 10,6%        | 15       | 11,1%        | 32     | 10,8%        |
|                                                                                 | ≥ 91          | <5       | *            | <5       | *            | <5     | *            |
|                                                                                 | Gesamt        | 161      | 100,0%       | 135      | 100,0%       | 296    | 100,0%       |
| Nicht-steroidale Antipsoriatika zur dermalen Anwendung als Kombinationstherapie | 1-10          | <5       | *            | 0        | 0,0%         | <5     | *            |
|                                                                                 | 11-20         | <5       | *            | 0        | 0,0%         | <5     | *            |
|                                                                                 | 21-30         | <5       | *            | <5       | *            | <5     | *            |
|                                                                                 | 31-40         | 10       | 6,8%         | 8        | 6,7%         | 18     | 6,7%         |
|                                                                                 | 41-50         | 19       | 12,9%        | 16       | 13,3%        | 35     | 13,1%        |
|                                                                                 | 51-60         | 41       | 27,9%        | 35       | 29,2%        | 76     | 28,5%        |
|                                                                                 | 61-70         | 51       | <b>34,7%</b> | 37       | <b>30,8%</b> | 88     | <b>33,0%</b> |
|                                                                                 | 71-80         | 20       | 13,6%        | 20       | 16,7%        | 40     | 15,0%        |
|                                                                                 | 81-90         | <5       | *            | <5       | *            | <5     | *            |

| Therapiegruppe | Altersgruppen | Weiblich |        | Männlich |        | Gesamt |        |
|----------------|---------------|----------|--------|----------|--------|--------|--------|
|                |               | n        | %      | n        | %      | n      | %      |
|                | ≥ 91          | <5       | *      | 0        | 0,0%   | <5     | *      |
|                | Gesamt        | 147      | 100,0% | 120      | 100,0% | 267    | 100,0% |

\* Werte können aus Datenschutzgründen nicht ausgewiesen werden

Tab. S10: Demografie der Therapieformen – Kollagenosen

| Therapiegruppe                                       | Altersgruppen | Weiblich |              | Männlich |              | Gesamt |              |
|------------------------------------------------------|---------------|----------|--------------|----------|--------------|--------|--------------|
|                                                      |               | n        | %            | n        | %            | n      | %            |
| Biologika/JAKi                                       | 1-10          | <5       | *            | 0        | 0,0%         | <5     | *            |
|                                                      | 11-20         | 5        | 1,0%         | <5       | *            | 9      | 1,3%         |
|                                                      | 21-30         | 37       | 7,3%         | <5       | *            | 41     | 6,1%         |
|                                                      | 31-40         | 46       | 9,1%         | 19       | 11,7%        | 65     | 9,7%         |
|                                                      | 41-50         | 60       | 11,8%        | 32       | 19,8%        | 92     | 13,7%        |
|                                                      | 51-60         | 133      | <b>26,2%</b> | 41       | <b>25,3%</b> | 174    | <b>26,0%</b> |
|                                                      | 61-70         | 131      | 25,8%        | 35       | 21,6%        | 166    | 24,8%        |
|                                                      | 71-80         | 79       | 15,6%        | 19       | 11,7%        | 98     | 14,6%        |
|                                                      | 81-90         | 16       | 3,1%         | 8        | 4,9%         | 24     | 3,6%         |
|                                                      | ≥ 91          | 0        | 0,0%         | 0        | 0,0%         | 0      | 0,0%         |
|                                                      | Gesamt        | 508      | 100,0%       | 162      | 100,0%       | 670    | 100,0%       |
| csDMARDs & klassische systemische Therapien          | 1-10          | 7        | 0,2%         | 5        | 0,6%         | 12     | 0,3%         |
|                                                      | 11-20         | 43       | 1,4%         | 9        | 1,1%         | 52     | 1,3%         |
|                                                      | 21-30         | 140      | 4,4%         | 26       | 3,3%         | 166    | 4,2%         |
|                                                      | 31-40         | 310      | 9,8%         | 55       | 6,9%         | 365    | 9,2%         |
|                                                      | 41-50         | 457      | 14,5%        | 99       | 12,4%        | 556    | 14,0%        |
|                                                      | 51-60         | 756      | <b>23,9%</b> | 197      | <b>24,7%</b> | 953    | <b>24,1%</b> |
|                                                      | 61-70         | 703      | 22,2%        | 172      | 21,6%        | 875    | 22,1%        |
|                                                      | 71-80         | 555      | 17,6%        | 175      | 21,9%        | 730    | 18,4%        |
|                                                      | 81-90         | 180      | 5,7%         | 58       | 7,3%         | 238    | 6,0%         |
|                                                      | ≥ 91          | 9        | 0,3%         | <5       | *            | 11     | 0,3%         |
|                                                      | Gesamt        | 3.160    | 100,0%       | 798      | 100,0%       | 3.958  | 100,0%       |
| Systemische Corticosteroide als Monotherapie         | 1-10          | 14       | 0,5%         | 13       | 1,1%         | 27     | 0,6%         |
|                                                      | 11-20         | 25       | 0,8%         | <5       | *            | 29     | 0,7%         |
|                                                      | 21-30         | 74       | 2,5%         | 26       | 2,3%         | 100    | 2,4%         |
|                                                      | 31-40         | 126      | 4,2%         | 35       | 3,1%         | 161    | 3,9%         |
|                                                      | 41-50         | 238      | 7,9%         | 67       | 5,8%         | 305    | 7,3%         |
|                                                      | 51-60         | 490      | 16,2%        | 152      | 13,3%        | 642    | 15,4%        |
|                                                      | 61-70         | 716      | 23,7%        | 264      | 23,0%        | 980    | 23,5%        |
|                                                      | 71-80         | 851      | <b>28,2%</b> | 376      | <b>32,8%</b> | 1.227  | <b>29,5%</b> |
|                                                      | 81-90         | 453      | 15,0%        | 202      | 17,6%        | 655    | 15,7%        |
|                                                      | ≥ 91          | 30       | 1,0%         | 7        | 0,6%         | 37     | 0,9%         |
|                                                      | Gesamt        | 3.017    | 100,0%       | 1.146    | 100,0%       | 4.163  | 100,0%       |
| Systemische Corticosteroide als Kombinationstherapie | 1-10          | <5       | *            | <5       | *            | 7      | 0,3%         |
|                                                      | 11-20         | 22       | 1,1%         | <5       | *            | 25     | 1,0%         |
|                                                      | 21-30         | 98       | 5,1%         | 14       | 2,7%         | 112    | 4,6%         |
|                                                      | 31-40         | 160      | 8,4%         | 37       | 7,2%         | 197    | 8,1%         |
|                                                      | 41-50         | 258      | 13,5%        | 67       | 13,0%        | 325    | 13,4%        |
|                                                      | 51-60         | 463      | <b>24,2%</b> | 130      | <b>25,3%</b> | 593    | <b>24,4%</b> |
|                                                      | 61-70         | 446      | 23,3%        | 111      | 21,6%        | 557    | 22,9%        |
|                                                      | 71-80         | 352      | 18,4%        | 113      | 22,0%        | 465    | 19,2%        |
|                                                      | 81-90         | 109      | 5,7%         | 35       | 6,8%         | 144    | 5,9%         |

| Therapiegruppe                                                                  | Altersgruppen | Weiblich |              | Männlich |              | Gesamt |              |
|---------------------------------------------------------------------------------|---------------|----------|--------------|----------|--------------|--------|--------------|
|                                                                                 |               | n        | %            | n        | %            | n      | %            |
|                                                                                 | ≥ 91          | <5       | *            | <5       | *            | <5     | *            |
|                                                                                 | Gesamt        | 1.914    | 100,0%       | 514      | 100,0%       | 2.428  | 100,0%       |
| NSAR – nichtsteroidales Antirheumatikum                                         | 1-10          | 37       | 0,8%         | 45       | 2,2%         | 82     | 1,3%         |
|                                                                                 | 11-20         | 77       | 1,7%         | 36       | 1,8%         | 113    | 1,7%         |
|                                                                                 | 21-30         | 128      | 2,8%         | 39       | 1,9%         | 167    | 2,6%         |
|                                                                                 | 31-40         | 232      | 5,2%         | 66       | 3,3%         | 298    | 4,6%         |
|                                                                                 | 41-50         | 374      | 8,3%         | 145      | 7,2%         | 519    | 8,0%         |
|                                                                                 | 51-60         | 721      | 16,0%        | 304      | 15,2%        | 1.025  | 15,7%        |
|                                                                                 | 61-70         | 1.052    | 23,4%        | 426      | 21,2%        | 1.478  | 22,7%        |
|                                                                                 | 71-80         | 1.203    | <b>26,7%</b> | 611      | <b>30,5%</b> | 1.814  | <b>27,9%</b> |
|                                                                                 | 81-90         | 622      | 13,8%        | 313      | 15,6%        | 935    | 14,4%        |
|                                                                                 | ≥ 91          | 56       | 1,2%         | 21       | 1,0%         | 77     | 1,2%         |
|                                                                                 | Gesamt        | 4.502    | 100,0%       | 2.006    | 100,0%       | 6.508  | 100,0%       |
| Coxibe (COX-2-Hemmer)                                                           | 1-10          | 0        | 0,0%         | 0        | 0,0%         | 0      | 0,0%         |
|                                                                                 | 11-20         | <5       | *            | 0        | 0,0%         | <5     | *            |
|                                                                                 | 21-30         | 7        | 1,8%         | <5       | *            | 8      | 1,6%         |
|                                                                                 | 31-40         | 13       | 3,3%         | 5        | 4,6%         | 18     | 3,6%         |
|                                                                                 | 41-50         | 33       | 8,5%         | 8        | 7,4%         | 41     | 8,2%         |
|                                                                                 | 51-60         | 75       | 19,2%        | 27       | 25,0%        | 102    | 20,5%        |
|                                                                                 | 61-70         | 92       | 23,6%        | 22       | 20,4%        | 114    | 22,9%        |
|                                                                                 | 71-80         | 111      | <b>28,5%</b> | 28       | <b>25,9%</b> | 139    | <b>27,9%</b> |
|                                                                                 | 81-90         | 43       | 11,0%        | 17       | 15,7%        | 60     | 12,0%        |
|                                                                                 | ≥ 91          | 12       | 3,1%         | 0        | 0,0%         | 12     | 2,4%         |
|                                                                                 | Gesamt        | 390      | 100,0%       | 108      | 100,0%       | 498    | 100,0%       |
| Nicht-steroidale Antipsoriatika zur dermalen Anwendung als Monotherapie         | 1-10          | 0        | 0,0%         | 0        | 0,0%         | 0      | 0,0%         |
|                                                                                 | 11-20         | 0        | 0,0%         | <5       | *            | <5     | *            |
|                                                                                 | 21-30         | <5       | *            | <5       | *            | 5      | 2,9%         |
|                                                                                 | 31-40         | <5       | *            | <5       | *            | 6      | 3,5%         |
|                                                                                 | 41-50         | 7        | 6,7%         | 5        | 7,4%         | 12     | 7,0%         |
|                                                                                 | 51-60         | 21       | 20,2%        | 9        | 13,2%        | 30     | 17,4%        |
|                                                                                 | 61-70         | 31       | <b>29,8%</b> | 21       | <b>30,9%</b> | 52     | <b>30,2%</b> |
|                                                                                 | 71-80         | 30       | 28,8%        | 16       | 23,5%        | 46     | 26,7%        |
|                                                                                 | 81-90         | 10       | 9,6%         | 9        | 13,2%        | 19     | 11,0%        |
|                                                                                 | ≥ 91          | 0        | 0,0%         | 0        | 0,0%         | 0      | 0,0%         |
|                                                                                 | Gesamt        | 104      | 100,0%       | 68       | 100,0%       | 172    | 100,0%       |
| Nicht-steroidale Antipsoriatika zur dermalen Anwendung als Kombinationstherapie | 1-10          | <5       | *            | 0        | 0,0%         | <5     | *            |
|                                                                                 | 11-20         | 0        | 0,0%         | <5       | *            | <5     | *            |
|                                                                                 | 21-30         | <5       | *            | 0        | 0,0%         | <5     | *            |
|                                                                                 | 31-40         | <5       | *            | 0        | 0,0%         | <5     | *            |
|                                                                                 | 41-50         | 9        | 22,5%        | <5       | *            | 11     | 20,8%        |
|                                                                                 | 51-60         | 9        | 22,5%        | <5       | *            | 13     | 24,5%        |
|                                                                                 | 61-70         | 11       | <b>27,5%</b> | <5       | *            | 15     | <b>28,3%</b> |
|                                                                                 | 71-80         | 6        | 15,0%        | <5       | *            | 8      | 15,1%        |
|                                                                                 | 81-90         | <5       | *            | 0        | 0,0%         | <5     | *            |

| Therapiegruppe | Altersgruppen | Weiblich |        | Männlich |        | Gesamt |        |
|----------------|---------------|----------|--------|----------|--------|--------|--------|
|                |               | n        | %      | n        | %      | n      | %      |
|                | ≥ 91          | 0        | 0,0%   | 0        | 0,0%   | 0      | 0,0%   |
|                | Gesamt        | 40       | 100,0% | 13       | 100,0% | 53     | 100,0% |

\* Werte können aus Datenschutzgründen nicht ausgewiesen werden
